# Supplementary material for: One Image, All Aberrations: A Universal Framework for Wavefront Correction
Source: Research Square preprint supplement (doi:10.21203/rs.3.rs-7730754/v1), 2025-10-13
Supplement: Supplementary file 1 [file ad3a7ae07aa6de2bdd72f0d0.pdf]

# Supplementary Information for: One Image, All Aberrations: A Universal Framework for Wavefront Correction

Sina Moayed Baharlou<sup>1,2†</sup>, Muhammad Waleed Khalid<sup>1†</sup>, Guli Gulinihali<sup>1</sup>, Jeongho Ha<sup>1</sup>, Liyi Hsu<sup>1</sup>, Samantha C. Lewis<sup>3</sup>, Lei Tian<sup>2</sup>, Yeshaiahu Fainman<sup>1</sup>, Alexander Sergienko<sup>2</sup>, and Abdoulaye Ndao<sup>1,2\*</sup>

<sup>1</sup>Department of Electrical and Computer Engineering, University of California, San Diego, La Jolla, CA 92093, USA

<sup>2</sup>Department of Electrical and Computer Engineering & Photonics Center, Boston University, Boston, MA, USA

<sup>3</sup>Department of Molecular and Cell Biology, University of California, Berkeley, CA, USA

\*Address correspondence to: a1ndao@ucsd.edu

†These authors contributed equally to this work.

## 1 Challenges of Single-Shot Systems

The goal of the proposed framework is to detect optical aberrations from a single-intensity image captured from various beam types. Existing approaches face limitations in achieving this task: First, they are generally restricted to using the Point Spread Function (PSF) and cannot directly detect aberrations from intensity images of other complex structured lights. Second, they require two or more intensity images captured at different focal planes to recover the phase due to the inherent focal plane ambiguity.

Focal Plane Ambiguity occurs when two or more phase aberrations produce nearly identical intensity distributions. The prevailing case is when a phase and its conjugate inverse produce the same intensity profile. In less frequent cases, different aberrations can produce similar effects on intensity images. For instance, vertical astigmatism and defocus can both result in the expansion of a Gaussian beam when the intensity of the aberration magnitude is low. Additionally, when the system is designed to work with different beam types, and a specific type is not known in advance, this can introduce ambiguity across different beams. For example, a first-order OAM beam that has vertical astigmatism aberration can produce a similar intensity profile as a Hermite Gaussian beam.

When predicting aberration from a single image, ambiguity is not the only challenge, even when the system is designed to trade off accuracy to estimate sign-less aberration coefficients. Another

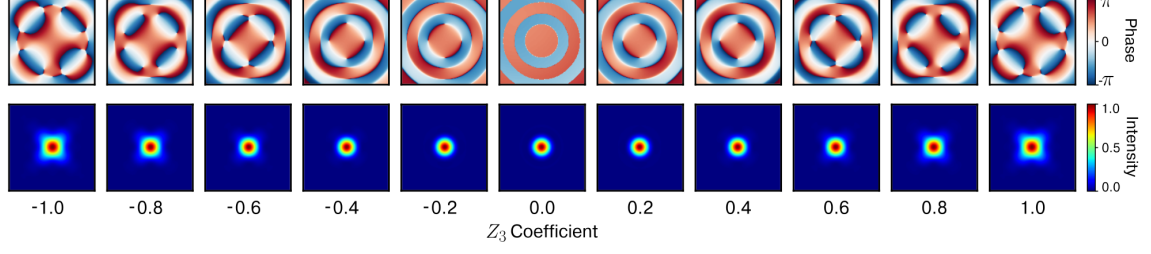

Figure S1: Gaussian beam aberrated with varying values of oblique astigmatism. The figure demonstrates the ambiguity issue, where aberrations produce similar effects regardless of their sign, and highlights plateau regions where changes in aberration coefficients within the range of -0.4 to 0.4 do not significantly affect the beam intensity.

challenge is the presence of plateau regions in the phase-to-intensity mapping. Plateau regions are areas where changes in aberration coefficients do not significantly affect the intensity. In those regions, the intensity profile provides limited information about the phase, making it more difficult for the system to learn the inverse mapping and accurately predict the aberrations.

Figure S1 illustrates a scenario where both ambiguity and plateau issues can be observed. This figure displays a Gaussian beam that is aberrated with varying values of oblique astigmatism ( $Z_3$ ), ranging from -1 to 1. Both positive and negative aberration coefficients yield identical intensity profiles, highlighting the ambiguity. Additionally, the intensity profiles remain mostly stationary within the range of -0.4 to 0.4, which demonstrates the plateau issue.

In what follows, we demonstrate how a trained bias can resolve the ambiguities (disambiguation) and overcome issues caused by plateau regions (amplification).

## 2 Optical Model and Focal Plane Ambiguity

In this section, we first present the model used to represent optical aberrations, then demonstrate the most prevalent source of Focal Plane Ambiguity (FPA), and finally show how a single engineered bias can eliminate this ambiguity in the presence of wavefront aberrations.

Given a 2-dimensional input field  $U_0(x, y) = U(x, y, z = 0)$  at the entrance pupil of a focusing lens, the resulting field at the back focal plane,  $U_f(x, y) = U(x, y, z = f)$ , can be determined by:

$$U_f(u, v) = \frac{e^{ikf} e^{\frac{ik(x^2+y^2)}{2f}}}{i\lambda f} \mathcal{F} \left\{ U_0(x, y) A_p(x, y) e^{i\varphi_w(x, y)} \right\} (u, v) \quad (1)$$

where  $\lambda$  is the wavelength,  $k$  is wavenumber,  $A_p(x, y)$  is the aperture function, and  $\varphi_w$  is the wavefront aberration. The leading prefactor, including global and quadratic phase terms, does not affect the normalized intensity and can be omitted for simplicity:

$$U_f(u, v) \propto \mathcal{F} \left\{ U_0(x, y) A_a(x, y) e^{i\varphi_w(x, y)} \right\} (u, v) \quad (2)$$

The input field is defined as  $U_0(x, y) = A(x, y) e^{i\varphi_p(x, y)}$ , where,  $A(x, y)$  denotes the amplitude, and

$\varphi_p(x, y)$  the phase profile of the beam, both assumed to be real-valued functions. The intensity distribution of the beam at the focal plane is given by:

$$I(u, v) \propto \left| \mathcal{F} \left\{ U_0(x, y) A_a(x, y) e^{i\varphi_w(x, y)} \right\} (u, v) \right|^2 \quad (3)$$

## 2.1 Focal Plane Ambiguity

Since our primary focus is on phase ambiguity and the effect of aberrations on the intensity profile, we consider the case of a plane wave,  $U_0(x, y) = 1$ , and denote the aberration phase as  $\varphi(x, y)$  for simplicity, instead of  $\varphi_w(x, y)$ . We then define the modified pupil function as  $\tilde{U}_0(x, y) = A_a(x, y) e^{i\varphi(x, y)}$ . Therefore, Equation 2 can be rewritten as:

$$U_f(u, v) \propto \iint \tilde{U}_0(x, y) e^{-2\pi i(\xi x + \eta y)} dx dy \quad (4)$$

The phase term  $\varphi(x, y)$  can be written as a decomposition of even and odd symmetry functions:

$$\varphi(x, y) = \varphi_o(x, y) + \varphi_e(x, y) \quad (5)$$

Using the decomposed phase, removing the Euler representation, and performing the multiplication yields the following:

$$\begin{aligned} \tilde{U}_0(x, y) &= A_a(x, y) e^{i\varphi_e(x, y)} \cdot e^{i\varphi_o(x, y)} \\ &= A_a(x, y) (\cos \varphi_o(x, y) + i \sin \varphi_o(x, y)) (\cos \varphi_e(x, y) + i \sin \varphi_e(x, y)) \\ &= A_a(x, y) (\cos \varphi_o \cos \varphi_e + i \cos \varphi_o \sin \varphi_e + i \sin \varphi_o \cos \varphi_e - \sin \varphi_o \sin \varphi_e) \end{aligned} \quad (6)$$

To simplify our equations, we will set  $A_a(x, y) = 1$  and omit it from our calculations. Each term in Equation 6 is either even or odd:

$$\tilde{U}_0(x, y) = \overbrace{\cos \varphi_o}^{\text{even}} \overbrace{\cos \varphi_e}^{\text{even}} + i \overbrace{\cos \varphi_o}^{\text{even}} \overbrace{\sin \varphi_e}^{\text{odd}} + i \overbrace{\sin \varphi_o}^{\text{odd}} \overbrace{\cos \varphi_e}^{\text{even}} - \overbrace{\sin \varphi_o}^{\text{odd}} \overbrace{\sin \varphi_e}^{\text{odd}} \quad (7)$$

Using an abbreviated form, we have:

$$\tilde{U}_0(x, y) = c_{\varphi_o} c_{\varphi_e} + i c_{\varphi_o} s_{\varphi_e} + i s_{\varphi_o} c_{\varphi_e} - s_{\varphi_o} s_{\varphi_e} \quad (8)$$

The odd and even parts in the complex exponential of Equation 4 can be determined as follows:

$$e^{-2\pi i(\xi x + \eta y)} = \overbrace{\cos(2\pi(\xi x + \eta y))}^{\text{even}} - i \overbrace{\sin(2\pi(\xi x + \eta y))}^{\text{odd}} \quad (9)$$

Writing this equation in an abbreviated form, we obtain the following:

$$e^{-2\pi i(\xi x + \eta y)} = c_f - i s_f \quad (10)$$

Substituting Equation 8 and 10 into 4, we obtain:

$$U_f(u, v) \propto \iint (c_{\varphi_o} c_{\varphi_e} + i c_{\varphi_o} s_{\varphi_e} + i s_{\varphi_o} c_{\varphi_e} - s_{\varphi_o} s_{\varphi_e}) (c_f - i s_f) dx dy \quad (11)$$

By performing the multiplications and separating the integrals, we can determine the odd and even parts:

$$\begin{aligned} U_f(u, v) \propto & \iint \overbrace{c_{\varphi_o} c_{\varphi_e} c_f}^{\text{even}} - i \iint \overbrace{c_{\varphi_o} c_{\varphi_e} s_f}^{\text{odd}} + i \iint \overbrace{c_{\varphi_o} s_{\varphi_e} c_f}^{\text{even}} + \iint \overbrace{c_{\varphi_o} s_{\varphi_e} s_f}^{\text{odd}} \\ & + i \iint \overbrace{s_{\varphi_o} c_{\varphi_e} c_f}^{\text{odd}} + \iint \overbrace{s_{\varphi_o} c_{\varphi_e} s_f}^{\text{even}} - \iint \overbrace{s_{\varphi_o} s_{\varphi_e} c_f}^{\text{odd}} + i \iint \overbrace{s_{\varphi_o} s_{\varphi_e} s_f}^{\text{even}} \end{aligned} \quad (12)$$

The integral of odd functions over symmetrical limits is zero; therefore, we can reduce Equation 12 to only four even terms:

$$U_f(u, v) \propto \iint c_{\varphi_o} c_{\varphi_e} c_f + i \iint c_{\varphi_o} s_{\varphi_e} c_f + \iint s_{\varphi_o} c_{\varphi_e} s_f + i \iint s_{\varphi_o} s_{\varphi_e} s_f \quad (13)$$

We can write Equation 13 in terms of the real and imaginary parts:

$$U_f(u, v) \propto \overbrace{\iint c_{\varphi_e} (c_{\varphi_o} c_f + s_{\varphi_o} s_f)}^{X: \text{Real}} + i \overbrace{\iint s_{\varphi_e} (c_{\varphi_o} c_f + s_{\varphi_o} s_f)}^{Y: \text{Imaginary}} \quad (14)$$

The intensity at the focal plane is determined as the sum of the squares of the following terms:

$$I_f(u, v) = |U_f(u, v)|^2 \propto X^2 + Y^2 \quad (15)$$

Since the intensity at the focal plane does not depend on the sign of the imaginary part, it creates ambiguity, where  $\varphi(x, y)$  and its conjugate inverse  $\bar{\varphi}(-x, -y)$  (also referred to as the ambiguous pair) produce the same intensity, which we refer to as the **Focal Plane Ambiguity (FPA)**. To demonstrate this, we break down  $\bar{\varphi}(-x, -y)$  into its the even and odd components:

$$\bar{\varphi}(-x, -y) = -(\varphi_o(-x, -y) + \varphi_e(-x, -y)) = \varphi_o(x, y) - \varphi_e(x, y) \quad (16)$$

This shows that  $\varphi(x, y)$  and  $\bar{\varphi}(-x, -y)$  differ only in the sign of the even part. The intensity profile of this ambiguous pair can be determined as follows:

$$\begin{aligned} \varphi(x, y) = \varphi_o(x, y) + \varphi_e(x, y) & \rightarrow U_f(u, v) \propto X + iY \rightarrow |U_f(u, v)|^2 \propto X^2 + Y^2 \\ \bar{\varphi}(-x, -y) = \varphi_o(x, y) - \varphi_e(x, y) & \rightarrow U_f(u, v) \propto X - iY \rightarrow |U_f(u, v)|^2 \propto X^2 + Y^2 \end{aligned} \quad (17)$$

This shows that the intensity at the focal plane *does not* depend on the sign of the even component of the phase distribution.



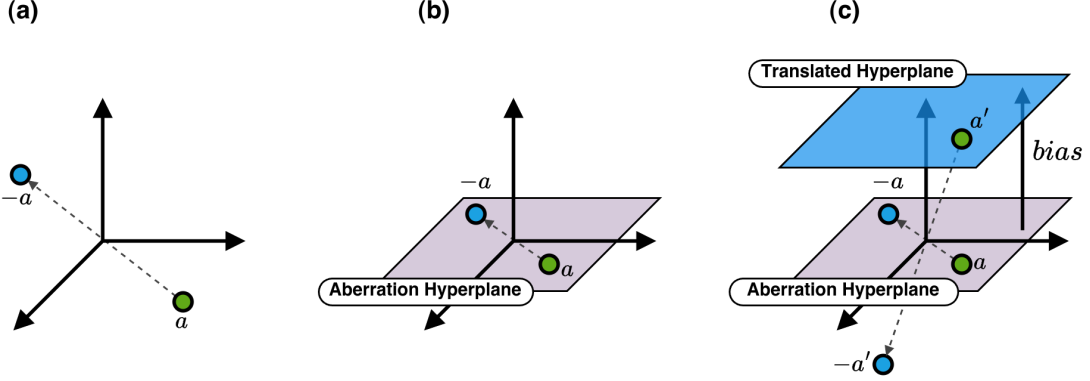

Figure S2: Illustrating the existence of ambiguity in the even phase space under different conditions. (a) Ambiguity exists throughout the entire space, when there are no constraints on representing the phase, (b) ambiguity exists within the aberration hyperplane, (c) ambiguity does not exist in the translated hyperplane, as the reflections of the points do not lie in the same hyperplane.

## 2.2 Role of the Bias

We can represent the even component  $\varphi_e(x, y)$  of the phase as a point in the even phase space, denoted by  $\mathbf{a} \in \mathcal{R}^n$ , where  $n$  represents the dimension of the space. This representation is achieved by vectorizing the discretized function  $\varphi_e(x, y)$ . Furthermore,  $-\varphi_e(x, y)$  corresponds to  $-\mathbf{a}$ . According to Equation 17, if the odd part is fixed, any arbitrary point  $\mathbf{a}$  in this space and its reflection  $-\mathbf{a}$  will produce identical intensity distributions. Therefore, this ambiguity is present throughout the entire space, as illustrated in Figure S2.a.

### 2.2.1 Aberration Hyperplane

In case of wavefront aberrations, the phase distribution is typically a smooth function that can be represented in a lower-dimensional space using Zernike polynomials. We can write Equation 5 in terms of angularly even and odd Zernike terms as follows:

$$\varphi(x, y) = \sum_{\text{odd } l, r} \alpha_{l, r} Z_r^l + \sum_{\text{even } l, r} \beta_{l, r} Z_r^l \quad (18)$$

Where  $\alpha \in \mathcal{R}^k$ ,  $\beta \in \mathcal{R}^m$  are the coefficients of angularly odd and even polynomials, respectively. When we visualize the even part as points in the even phase space, these points are confined to a subspace within the larger phase space. This confinement occurs because the even part is expressed using  $\beta$ , which has a lower dimension than the original space  $m \ll n$ . To better understand this, we let  $m = n - 1$  so the aberration subspace can be viewed as a hyperplane. In this situation, point  $\mathbf{a}$  cannot take arbitrary values but only those that lie on the aberration hyperplane.

The origin of the space also lies within the hyperplane ( $\beta = 0 \rightarrow \sum_{\text{even } l, r} \beta_{l, r} Z_r^l = 0$ ). Therefore, for any point on this hyperplane, the corresponding reflection also exist on the same plane. This

leads to the persistence of ambiguity within that hyperplane, as illustrated in Figure S2.b.

### 2.2.2 Translated Hyperplane

The aberration hyperplane can be translated away from the origin in a way such that for any point on the translated plane  $\mathbf{a}'$ , its reflection  $-\mathbf{a}'$  does not lie on the same plane (shown in Figure.S2.c). This translation can be expressed as a bias term  $\mathbf{a}' = \mathbf{a} + \mathbf{b}$  where  $\mathbf{b}$  is the vectorized form of  $\varphi_b(x, y)$ . This term can be interpreted as an additional phase shift that can be applied to the system using a single phase plate:

$$\Phi(x, y) = \varphi(x, y) + \varphi_b(x, y) = \sum_{\text{odd } l, r} \alpha_{l, r} Z_r^l + \left( \sum_{\text{even } l, r} \beta_{l, r} Z_r^l + \varphi_b(x, y) \right) \quad (19)$$

The aberrations are fully represented using  $\alpha$  and  $\beta$  as before, and since the reflection of the points does not lie in the translated hyperplane, all aberrations will have unique intensity distributions. This leads to a new subspace where the ambiguity does not exist. It is also important to note that the ambiguous pair of  $\varphi$  and  $\bar{\varphi}$  in the original space will produce distinct intensity profiles in the translated space as well.

To make sure the origin doesn't lie within the translated hyperplane, the following condition must met:

$$\forall \beta_{l, r}, \left( \sum_{\text{even } l, r} \beta_{l, r} Z_r^l + \varphi_b(x, y) \right) \neq 0 \quad (20)$$

Essentially, the even component of the aberration should not cancel the bias. Therefore, the bias vector must not lie on the aberration hyperplane; instead, it should be represented in a higher dimension than the aberrations.

In addition to Equation 20, the bias must have even symmetric phase distribution, and must constructively interfere with the beam to produce a distinguishable intensity distributions. For example, a bias with a low magnitude will result in subtle changes that may not be distinguishable, especially in the presence of camera noise. If the magnitude is too high, it can scatter the beam, and since the camera frame is limited, important data may fall outside the intended crop. If the bias only consists of shapes with high spatial frequency, it can lead to changes that are difficult to distinguish. Specifically, due to the high k-vectors involved, these changes may not interfere with the beam or the resulting subtle variations might be outside the camera's view. For this reason, we determined the optimal phase distribution of our bias using the proposed machine learning approach.

## 3 Proposed Framework

The primary objective of our framework is to determine the phase aberration using a single-intensity image. In the previous section, we demonstrated how a single-phase mask can resolve the ambiguity caused by wavefront aberrations. This makes it possible to recover the aberration based on just one intensity image.

We propose a framework that utilizes Deep Neural Networks (DNNs) to accomplish this task. The framework consists of two main components: an optical part, which includes a trainable bias and is designed to eliminate the FPA and mitigate the impact of plateau regions, and a machine learning, which is defined as a DNN responsible for detecting the aberration from the captured intensity images. We refer to latter component as the Aberration Prediction Network (APN). In our simulations and training, we utilize  $\Phi(x, y)$  instead of  $\varphi(x, y)$ , which represents the phase when the bias is applied. In addition, in the experiments, we insert a phase plate before the focusing lens to induce the necessary phase shift. The framework is designed to detect aberrations not only from the aberrated intensity images of Gaussian beams but also from a variety of other structured beam profiles listed in Table 1, which makes the framework *universal*.

The optical part is defined as a function that applies additional phase shift to the aberrated beam and captures the intensity image at the focal plane. This function maps aberrations to their unique intensity images:

$$O_{\varphi_b} : \varphi \rightarrow I$$

$$I = O_{\varphi_b}(\varphi; U_0) \propto \left| \mathcal{F} \left\{ U_0(x, y) A_a(x, y) e^{i[\varphi(x, y) + \varphi_b(x, y)]} \right\} (u, v) \right|^2 \quad (21)$$

where  $U_0$  indicates the beam type,  $A_a$  is the aperture function, and  $\varphi_b$  denotes the trainable bias term. The propagation scaling factor from Equation 1 is omitted as it has no effect on the normalized intensity. APN then recovers the aberration using the single-intensity image and is defined as follows:

$$D_{\theta} : I \rightarrow \hat{\varphi} \quad (22)$$

Here  $\hat{\varphi}$  is an approximation of  $\varphi$ , and  $\theta$  represents the trainable parameters of the APN. The overall process is depicted in Figure 1 and can be expressed using the following expression:

$$\hat{\varphi} = D_{\theta}(O_{\varphi_b}(\varphi; U_0)) \quad (23)$$

Based on this, the framework can be viewed as an *autoencoder* [1], where the optical part serves as the encoder and the neural network functions as the decoder.

**Autoencoders** are special type of neural networks designed to transform the input data into a latent space, typically with the reduced dimension, using the encoder, and recover the original data from the latent space using the decoder. They are commonly used for feature extraction, dimensionality reduction, and denoising. Autoencoders can also be interpreted as models that learn to approximate the identity function. In this context, learning the identity function is beneficial as it ensures that we don't lose important information required to recover the aberration.

The goal is to find the optimal parameters  $\theta$  and  $\varphi_b$  so that, for a beam with an unknown aberration  $\varphi$ ,  $O_{\varphi_b}$  can eliminate the ambiguity, alleviate the impact of plateau regions, and produce a single intensity image, while  $D_{\theta}$ , our APN, can estimate the aberration  $\hat{\varphi}$  that is close to the true

one given the intensity image. Once the parameters are determined in the simulation,  $O_{\varphi_b}$  can run optically while the neural network operates computationally.

We train our framework in an end-to-end fashion, where the optical part and the neural network are jointly trained. We express the aberrations using Zernike Polynomials, which allows us to represent the aberration only using the coefficients  $\alpha$  and  $\beta$ . To simplify, we use a single term,  $\mathbf{c} = [\alpha; \beta]$ , which combines all the coefficients together. Therefore, the neural network only needs to estimate  $\mathbf{c}$ :

$$\hat{\mathbf{c}} = D_{\theta}(O_{\varphi_b}(\varphi; U_0)) \quad (24)$$

Equation 18 can be used to determine the phase given the Zernike coefficients. To train the framework, we created large-scale datasets of optical and atmospheric aberrations and minimized the following Mean-Square-Error (MSE) function:

$$\min_{\theta, \varphi_b} \mathcal{L}(\theta, \varphi_b), \quad \text{where } \mathcal{L}(\theta, \varphi_b) = \frac{1}{N} \frac{1}{C} \sum_{i=1}^N \sum_{j=1}^C (c_j^i - \hat{c}_j^i)^2 \quad (25)$$

where  $\mathcal{L}$  is the cost function,  $N$  is the number of training samples,  $C$  is the total number of Zernike coefficients.

In our simulation, we developed and implemented a differentiable version of the Bluestein method [2] as our light propagation model, instead of using the Fourier transform. This approach allows us to accurately determine the intensity distribution at the focal plane while providing flexibility in defining regions of interest and adjusting sampling rates. The function  $E_{\theta}$  is modeled using a modified Residual Neural Network [3]. The optimal architecture and training hyper-parameters are determined using a Hyper-Parameter Optimization (HPO) process utilizing the Optuna framework [4].

We applied the constraints from the previous section to ensure that the bias only have an even phase distribution. To achieve this, we imposed radial symmetry constraints on the bias, where only one-eighth of the bias is learnable. This portion is then mirrored and duplicated to create a radially symmetric phase distribution. Additionally, we constrained the bias values between  $-\pi/2$  and  $\pi/2$  using a *TanH* function to prevent the beam from scattering.

Since the framework is designed to learn the identity function between  $\varphi$  and  $\hat{\varphi}$ , and given that  $D_{\theta}$  is defined as a discriminative neural network which is only capable of learning one-to-one mappings, it is essential that the mapping between the aberration and the intensity images is also one-to-one. Initially, during the training process, the bias phase distribution is set to zero, leading to phase ambiguity, and one-to-many mappings in the inverse problem. As a result, the network cannot differentiate between  $\varphi$  and  $\bar{\varphi}$ . Therefore, a significant portion of the error from Equation 25, arises from this ambiguity. However, since the bias is trainable and given the imposed constraints, the phase distribution is updated step by step using backpropagation to minimize this error. Another part of the error is caused by APN's mistakes in predicting the aberrations in the plateau regions. The bias is also trained to minimize this error by shifting the aberration space to a subspace where small changes in aberration result in more significant changes in the intensity profile. Over time,

the phase distribution converges to a value where all aberrations have distinct and distinguishable intensity profiles, which also enables the neural network to learn the inverse mapping efficiently. In this approach, since the neural network relies on the images to detect the aberration, it ensures that the bias is adjusted in a way that the differences between the ambiguous pairs are distinguishable and keeps any informative changes within the image crop.

Next, we will discuss the various datasets we generated to train and evaluate our framework, and provide more details regarding the training parameters and results.

## 4 Datasets

We generated several datasets to train and evaluate the efficiency of our framework. These datasets contains the Zernike coefficients, together with indices of the assigned beam profile (listed in Table. 1). Since the intensity images are not constant, they are generated within the framework given the aberration and the current bias. The aberrations are expressed using the first nine and fourteen polynomials ( $Z_9$ ,  $Z_{14}$ ), as these coefficients capture the most common aberrations present in an optical system. However, for the robustness experiment, we created datasets with aberrations expressed using up to  $Z_{55}$  polynomials.

To determine the optimal bias and train the APN, we utilized datasets with uniformly sampled Zernike coefficients, and to validate the framework’s efficiency, we tested it on more realistic datasets including the Kolmogorov [5, 6] and one-hot datasets. Below, each of these datasets is discussed in detail.

| Index | Beam Profile  | Order    |
|-------|---------------|----------|
| 1     | Gaussian Beam | -        |
| 2     | OAM           | L=1      |
| 3     | OAM           | L=2      |
| 4     | OAM           | L=3      |
| 5     | HG            | N=1, M=0 |
| 6     | HG            | N=0, M=1 |
| 7     | HG            | N=1, M=1 |
| 8     | LG            | N=1, L=0 |
| 9     | LG            | N=2, L=0 |
| 10    | LG            | N=3, L=0 |

Table 1: Different beam profiles used in the proposed framework.

### 4.1 Datasets with Uniform Coefficients

The aberrations in this dataset are generated using the first nine polynomials ( $Z_9$ ), and the coefficients are uniformly sampled within the range of  $-1$  to  $1$ . There is no correlation between the polynomials and each of them has an equal chance of appearance. The dataset consists of 100,000 samples, each randomly assigned with a different beam profile. In this dataset, 90% of the data is

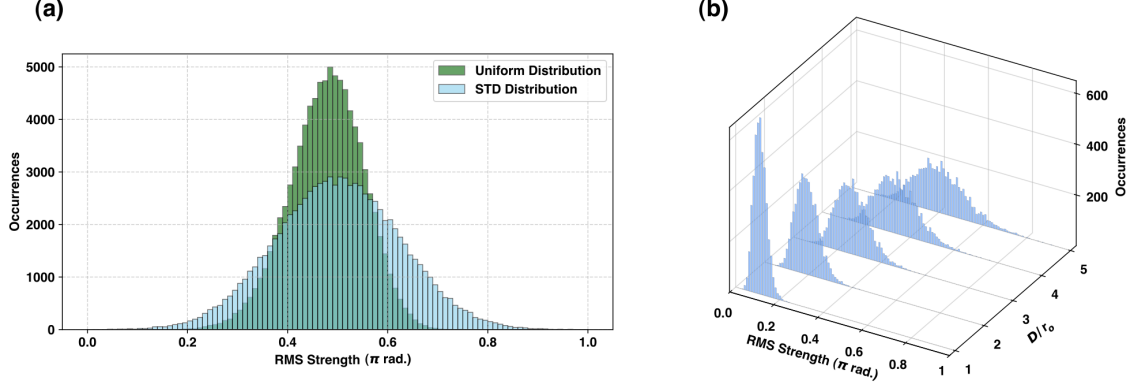

Figure S3: The RMS strength distribution of the generated datasets. (a) the RMS strength distribution of the dataset with uniform coefficients, and the dataset with adjusted standard strength, (b) the RMS strength distribution of the Kolmogorov dataset given different  $D/r_o$  values.

used for training, 5% for validation, and 5% for testing. The strength of each aberration can be determined by the Root-Mean-Square (RMS) function:

$$RMS(\varphi) = \sqrt{\frac{1}{n} \sum_{x,y} \varphi(x,y)^2} \quad (26)$$

Here  $n$  denotes the total number of pixels.

#### 4.1.1 Dataset with Adjusted Strength

We created a dataset similar to the one described in Section 4.1, where the RMS strength is sampled from a normal distribution with a mean of  $\pi/2$  and a standard deviation of  $\pi/8$ . This new dataset captures a broad range of aberration strengths, and the coefficients can have values greater than 1. In addition, we created another dataset with aberrations expressed using the first fourteen polynomials ( $Z_{14}$ ). This dataset contains 500,000 samples, with the same portion of training, validation, and test sets.

The distribution of aberration strength of these two datasets is depicted in Figure S3.a.

## 4.2 Kolmogorov Dataset

When dealing with more realistic aberrations caused by atmospheric turbulence, we typically rely on the Kolmogorov turbulence model [5, 6]. In this model, the Zernike coefficients are not statistically independent. Instead, they follow a Gaussian distribution with a mean of zero and a specific covariance matrix. This covariance matrix can be derived as follows:

$$\Sigma_{zz'} = \frac{K_{zz'} \delta_z \Gamma\left(\frac{n+n'-5/3}{2}\right) (D/r_o)^{5/3}}{\Gamma\left(\frac{n-n'+17/3}{2}\right) \Gamma\left(\frac{n'-n+17/3}{2}\right) \Gamma\left(\frac{n+n'+23/3}{2}\right)} \quad (27)$$

| $Z_i$ | 1      | 2      | 3      | 4      | 5      | 6     | 7      | 8      | 9     | 10    | 11     | 12     | 13     | 14    |
|-------|--------|--------|--------|--------|--------|-------|--------|--------|-------|-------|--------|--------|--------|-------|
| 1     | 0.454  | 0      | 0      | 0      | 0      | 0     | -0.014 | 0      | 0     | 0     | 0      | 0      | 0      | 0     |
| 2     | 0      | 0.454  | 0      | 0      | 0      | 0     | 0      | -0.014 | 0     | 0     | 0      | 0      | 0      | 0     |
| 3     | 0      | 0      | 0.023  | 0      | 0      | 0     | 0      | 0      | 0     | 0     | -0.004 | 0      | 0      | 0     |
| 4     | 0      | 0      | 0      | 0.023  | 0      | 0     | 0      | 0      | 0     | 0     | 0      | -0.004 | 0      | 0     |
| 5     | 0      | 0      | 0      | 0      | 0.023  | 0     | 0      | 0      | 0     | 0     | 0      | 0      | -0.004 | 0     |
| 6     | 0      | 0      | 0      | 0      | 0      | 0.006 | 0      | 0      | 0     | 0     | 0      | 0      | 0      | 0     |
| 7     | -0.014 | 0      | 0      | 0      | 0      | 0     | 0.006  | 0      | 0     | 0     | 0      | 0      | 0      | 0     |
| 8     | 0      | -0.014 | 0      | 0      | 0      | 0     | 0      | 0.006  | 0     | 0     | 0      | 0      | 0      | 0     |
| 9     | 0      | 0      | 0      | 0      | 0      | 0     | 0      | 0      | 0.006 | 0     | 0      | 0      | 0      | 0     |
| 10    | 0      | 0      | 0      | 0      | 0      | 0     | 0      | 0      | 0     | 0.002 | 0      | 0      | 0      | 0     |
| 11    | 0      | 0      | -0.004 | 0      | 0      | 0     | 0      | 0      | 0     | 0     | 0.002  | 0      | 0      | 0     |
| 12    | 0      | 0      | 0      | -0.004 | 0      | 0     | 0      | 0      | 0     | 0     | 0      | 0.002  | 0      | 0     |
| 13    | 0      | 0      | 0      | 0      | -0.004 | 0     | 0      | 0      | 0     | 0     | 0      | 0      | 0.002  | 0     |
| 14    | 0      | 0      | 0      | 0      | 0      | 0     | 0      | 0      | 0     | 0     | 0      | 0      | 0      | 0.002 |

Table 2: Covariance matrix of the first 14 Zernike polynomials expressed in ANSI standard scheme.  $Z_i$  denotes the order of the polynomial, and  $D/r_o = 1$ .

where  $n$  and  $m$  are the radial and azimuthal orders of  $z_j$ , respectively, while  $n'$  and  $m'$  represent the radial and azimuthal orders for  $z_{j'}$ , both following Noll's convention.  $(D/r_o)^{5/3}$  is scaling factor which depends on the aperture size  $D$ , and  $r_o$  which is Fried's parameter.  $\delta_z$  and  $K_{zz'}$  are expressed as follows:

$$\delta_z = (m = m') \wedge \left( \overline{\text{parity}(j, j')} \vee (m = 0) \right). \quad (28)$$

$$K_{zz'} = 2.2698(-1)^{(n+n'-2m)/2} \sqrt{(n+1)(n'+1)}. \quad (29)$$

The covariance matrix of the first 14 polynomials is presented in Table 2. This table shows that the polynomials that have the same angular frequency number are correlated. Additionally, it is evident that the variance (the diagonal values), which indicates a relative strength of the aberration modes, decreases significantly as we progress to higher-order polynomials.

Having the covariance matrix, we can sample points from this distribution using the SVD decomposition. We generated two test sets using the Kolmogorov Model: one that expresses aberrations using the first nine polynomials and another using fourteen polynomials. In both sets, we varied the scale parameter  $D/r_o$  value from 0 to 5, which characterizes the distortion strength. We generated 5,000 samples for each of these sets. The RMS strength of these datasets is shown in Figure S3.b.

### 4.3 One-hot Dataset

In this dataset, aberrations are created using a single Zernike polynomial. The generation process is as follows: a polynomial is chosen randomly from  $Z_1$  to  $Z_9$  or  $Z_{14}$  then its coefficient is uniformly sampled within the range of  $-1$  to  $1$ . We generated two test sets, each containing 5,000 samples, for  $Z_9$  and  $Z_{14}$ .

## 5 Training Process

The optical part is simulated using a differentiable version of the Bluestein method [2] that we implemented. This method takes a complex field as the input and calculates the propagated field at the given distance. By using a focusing lens with the input field, we can obtain an accurate intensity distribution at the focal plane.

In our simulations, the source field represents the aberrated beam augmented with the phase profile of the bias. The complex field is discretized into  $128 \times 128$  pixels. The width of the input field is 8640  $\mu\text{m}$ , while the output field has a smaller width size of 250  $\mu\text{m}$ . We calculate the normalized intensity from the output field, and feed it into our APN. The output of the network consists of the predicted Zernike coefficients  $\hat{\gamma}$ .

The entire framework is implemented in PyTorch [5] and runs on the Linux operating system with an RTX 3080 GPU.

### 5.1 Hyper-Parameter Optimization

The optimal architecture of the APN, along with the training hyper-parameters, is determined through the Hyper-Parameter Optimization (HPO) process using the Optuna framework [4]. Given a predefined range of parameters, Optuna explores this space to find the best settings that minimize the objective function.

We defined a smaller dataset with 40,000 samples and ran the HPO process for 100 trials. The distribution of the parameters is as follows: The batch size can take values of 32 or 64, and the learning rate is sampled from a logarithmic uniform distribution within the range of  $10^{-5}$  to  $10^{-2}$ . When determining the network architecture, HPO can select from simple convolutional neural networks to more complex, deeper residual ones.

The network can utilize fully connected layers, with different configurations listed in Table 4. It may also incorporate skip connections. The configuration for the convolutional layers is sampled from the items listed in Tables 5 and 6. Table 5 displays the number of residual blocks, while Table 6 shows the number of channels for each block. The final performance is evaluated using the MSE on the validation set. Table 3 lists the top five configurations with the lowest error values. We selected trial number 43 as our optimal setting because it achieved strong results while using fewer network weights. The final architecture is a modified version of ResNet34 [3].

### 5.2 Training Results

We trained our framework using the obtained hyper-parameters for 100 epochs on the dataset with uniform coefficients. This dataset ensures that the aberration space is evenly sampled and no polynomials are prioritized over the others. The learned phase distribution of the bias is illustrated in Figure S4.a. The training and validation curve is shown in Figure S4.b, which demonstrates the successful convergence of the network with no signs of underfitting or overfitting. This indicates that the framework successfully learned to eliminate FPA and map the intensity images to the corresponding aberration parameters.



| Trial Number | Batch Size | Learning Rate | Enable FC Layer | FC Layer Config | Skip Conn. | ResNet Blocks IDX | ResNet Channel IDX | MSE Val  |
|--------------|------------|---------------|-----------------|-----------------|------------|-------------------|--------------------|----------|
| 59           | 32         | 0.001857      | True            | 2               | True       | 2                 | 1                  | 0.000755 |
| 43           | 64         | 0.004056      | False           | -               | True       | 1                 | 1                  | 0.000894 |
| 75           | 64         | 0.002922      | True            | 1               | True       | 2                 | 1                  | 0.000979 |
| 5            | 32         | 0.001668      | False           | -               | True       | 2                 | 2                  | 0.001024 |
| 96           | 64         | 0.002981      | True            | 1               | True       | 1                 | 1                  | 0.001055 |

Table 3: The network configuration and hyper-parameters for the top five trials determined by the HPO process.

| Index | Dense Layers  |
|-------|---------------|
| 0     | 128           |
| 1     | 256, 128      |
| 2     | 512, 256, 128 |

Table 4: Dense Layer CFG

| Index | ResNet Blocks |
|-------|---------------|
| 0     | 1, 1, 1, 1    |
| 1     | 1, 2, 2, 1    |
| 2     | 2, 2, 2, 2    |
| 3     | 3, 4, 6, 3    |

Table 5: ResNet Block CFG

| Index | ResNet Channels   |
|-------|-------------------|
| 0     | 32, 64, 128, 256  |
| 1     | 64, 128, 256, 512 |
| 2     | 64, 128, 128, 128 |

Table 6: ResNet Channel CFG

To evaluate the network efficiency on the test set, we define the Root-Mean-Square Error (RMSE) function as follows:

$$RMSE(\varphi, \hat{\varphi}) = \sqrt{\frac{1}{n} \sum_{x,y} (\varphi(x, y) - \hat{\varphi}(x, y))^2} \quad (30)$$

This function measures the error in the phase space. The average RMSE obtained is  $0.02 \pi$  radians. The distribution of errors is shown in Figure S4.c, and the average error in predicting each Zernike coefficient is reported in Figure S4.d. Figures S19 to S21 present a detailed analysis of the performance of our framework. Figure S19 displays the training and validation curves for each Zernike polynomial individually. Figure S20 illustrates the error distribution for each beam profile, showing a comparable distribution of errors across the different profiles. Meanwhile, Figure S21 highlights the average prediction error for each polynomial across all beam profiles, confirming the stable performance of our network.

We also provided several qualitative examples of the process of aberration detection and correction using our framework. Figure S5 presents instances where the aberrated and corrected beams are displayed alongside the true aberration and the detected aberration, both shown in Zernike and phase spaces. Figure S22 illustrates samples where the intensity profiles after the bias modulation are also shown.

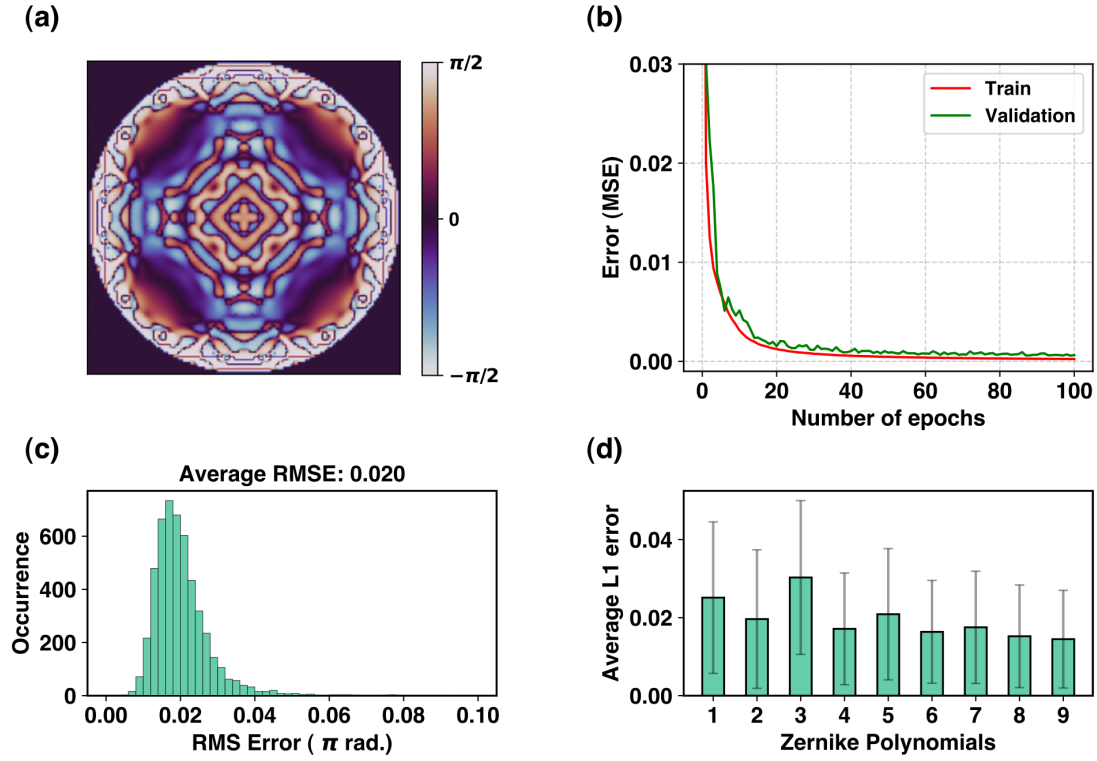

Figure S4: Results of the training process. (a) The optimal phase distribution of the bias obtained from the training process, (b) learning curve showing training and validation error over epochs, (c) error distribution on the test set, (d) average L1 error for each Zernike polynomial on the test set.

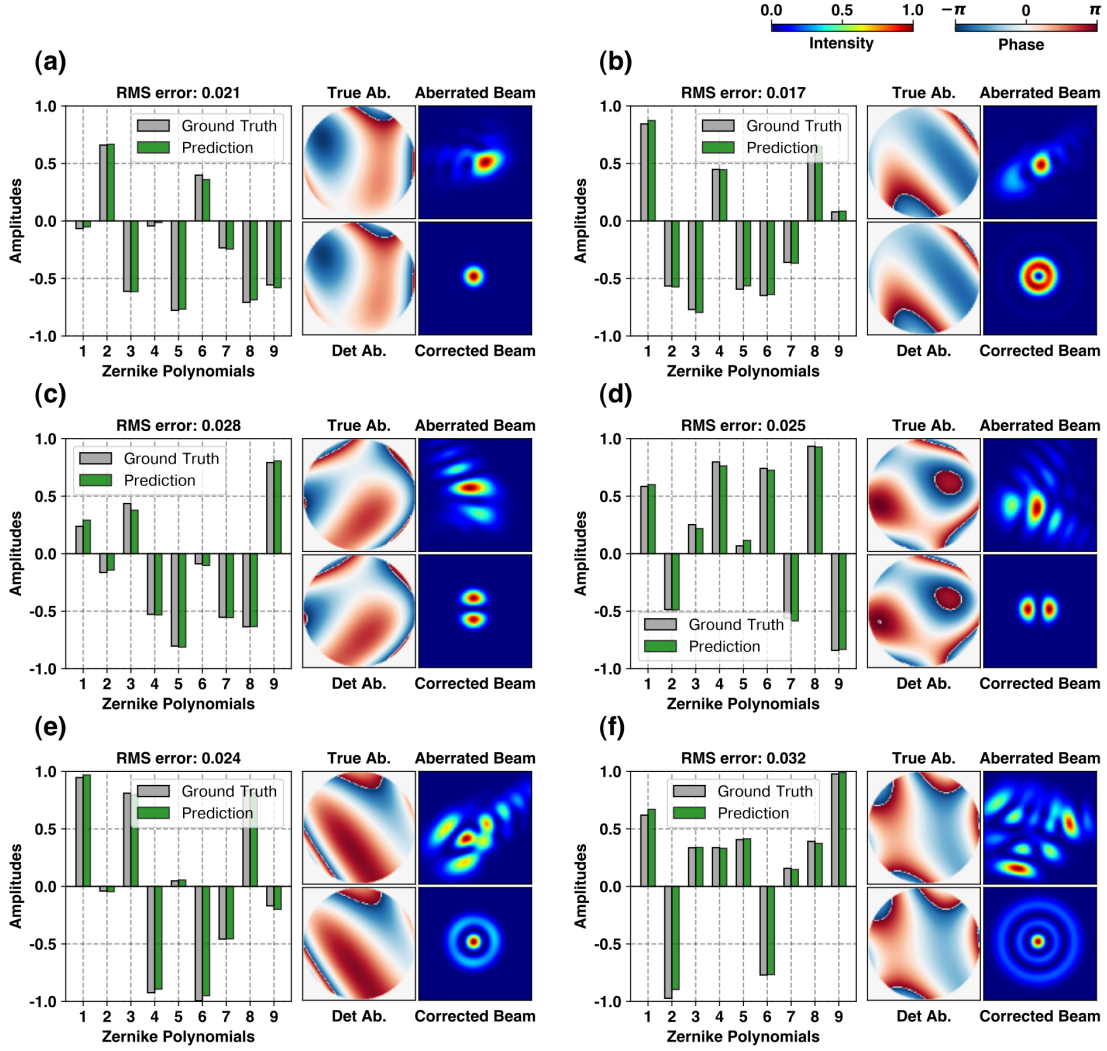

Figure S5: Qualitative examples of aberration detection using our framework on the dataset with uniform coefficients: (a) Gaussian, (b) OAM with  $L = 1$ , (c)  $HG_{1,0}$ , (d)  $HG_{0,1}$ , (e)  $LG_{1,0}$ , (f)  $LG_{2,0}$ . For each case, the corresponding ground truth and predicted aberration are shown in phase and Zernike space, alongside the aberrated beam and the corrected one.

## 6 Evaluation

To evaluate the framework under more realistic scenarios, we fine-tuned the APN on the dataset with adjusted strength, while keeping the bias phase constant. This enables the network to predict coefficients that are larger than one and improves its performance across a broader range of aberration strengths. A similar training parameters were used as in the previous section, and the network was trained on both  $Z_9$  and  $Z_{14}$  datasets. The fine-tuned networks are evaluated on robustness test cases, Kolmogorov, and one-hot datasets.

### 6.1 Robustness Tests

#### 6.1.1 Bias Comparison

In this experiment, we compare the effectiveness of our *trained* bias against several commonly known phase profiles used as biases. To do this, we trained the APN both without any bias and with the Zernike basis functions  $Z_3$ ,  $Z_4$ , and  $Z_{12}$ . In addition, we also used a random phase profile as a bias for comparison. Figure S6.a illustrates the validation curve from this training process, clearly indicating that our trained bias outperforms the others by a significant margin.

#### 6.1.2 Bias Interaction

We evaluated our framework in a scenario where there is only partial interaction between the beam and the bias size, concretely, when the beam’s diameter is less than the bias. For this test, we re-trained the network with various beam-bias interaction ratios and evaluated the framework on a test set with a specified beam size. Figure S6.b shows a consistent behavior when the beam interaction area ranges from 0.5 to 1. This also confirms that the bias can eliminate the FPA even when the beam does not fully interact with the bias.

#### 6.1.3 Ambiguous Pair Distinction

We conducted an experiment to quantitatively show that each aberration generates a unique intensity profile upon interaction with the bias.

We created several data sets, each containing 5000 samples, where a random aberration is expressed using Zernike radial orders ranging from the second to the ninth order ( $Z_9$  to  $Z_{55}$  polynomials). For each aberration  $\varphi$ , we calculated  $\bar{\varphi}$  and determined their intensity profiles before and after bias interaction. We expect these intensity profiles to be unique. To verify this numerically, we used the Learned Perceptual Image Patch Similarity (LPIPS) metric [7], to measure the similarity of each pair. This method offers a robust measurement of similarity based on the features extracted by trained DNNs. In this metric, zero signifies identical images, whereas one denotes substantial dissimilarity between them.

Figure S6.c shows the average LPIPS metric for the ambiguous pair with and without bias interaction. The results indicate that all ambiguous pairs produce distinct intensity profiles across a broad range of aberrations. This confirms that the bias effectively eliminates ambiguity in higher-

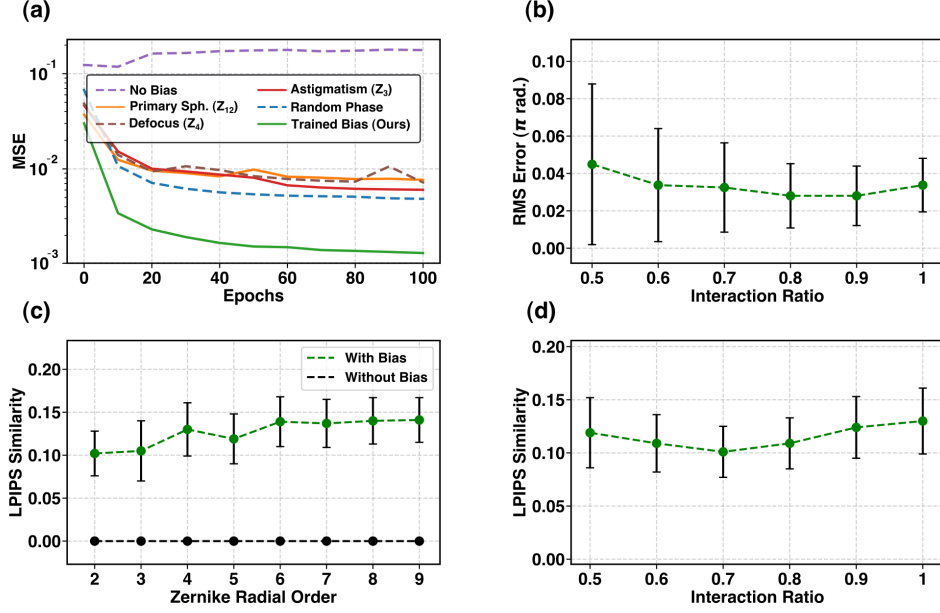

Figure S6: Demonstrating the robustness of our framework under different conditions. (a) A comparison of validation errors for the proposed bias against other fixed biases, (b) the performance of the framework in terms of RMS error at different interaction ratios between the beam and the bias, (c) perceptual similarity between ambiguous pairs expressed using different Zernike orders, and (d) perceptual similarity between the ambiguous pairs with varying interaction ratios between the beam and the bias.

order aberrations as well. Figure S6.d shows that the intensity profiles of the ambiguous pairs remain distinct, even when the beam partially interacts with the bias.

## 6.2 Plateau Regions

We conducted several experiments to demonstrate the existence of plateau regions, their impact on predicting optical aberrations, and how the trained bias mitigates the effects of these regions. As previously noted, plateau regions are areas where the intensity distribution exhibits low sensitivity to changes in aberration coefficients. Consequently, the system shows reduced accuracy when predicting aberrations within these regions. The plateau regions predominantly occur when the aberrations are not severe; that is, when the aberration coefficients are close to zero, as observed in Gaussian, Hermite-Gaussian, and Laguerre-Gaussian beams ( $L = 0$ ). These beams show lower sensitivity to even symmetrical aberrations in these regions, as such aberrations primarily affect areas with lower intensity. An instance of this slow rate of change is shown in Figure S1.

To demonstrate this numerically, we calculate the Jacobian of the propagation function with respect to the aberration coefficients. The Jacobian and its norm quantify how the intensity distribution changes as the aberration coefficients vary. Figure S7 shows calculated components of the Jacobian (partial derivatives with respect to a specific aberration) of the Gaussian beam, both before

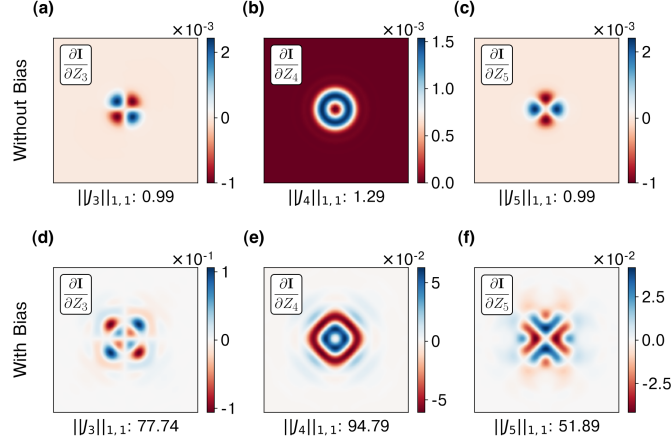

Figure S7: Partial derivatives (Jacobian components) of the intensity distribution of a Gaussian beam with respect to second-order Zernike aberrations, shown both before and after applying the bias. (a–c) the partial derivatives and their norms before using the bias, (d–f) partial derivatives and their norms after using the bias, demonstrating a significant increase in the norm.

and after using the bias, with all aberration coefficients set to zero. This figure illustrates how the intensity distribution changes when a specified aberration is introduced into the system. When the bias is utilized, the partial derivatives show much higher magnitudes and influence a larger area. As a result, the calculated norms have values that are at least 50 times greater. This implies that the intensity becomes more sensitive to the introduced aberrations when the bias is applied.

Figure S8 shows the calculated Jacobian norm on 2D cross-sections of the aberration space, illustrating the overall rate of change at various locations within this space. The blue regions indicate areas where the rate of change is minimal, referred to as plateau regions. After applying the bias, the rate of change increases, and the impact each aberration has on the intensity distribution is amplified.

In the next set of experiments, we demonstrate how the plateau regions affect the accuracy of aberration prediction and how the trained bias helps mitigate this issue. For comparison, we trained an additional network without using the bias, using the same configuration as the APN. To exclude the adverse effects of the ambiguities, this network was trained and evaluated only using the aberrations with positive even components in their phase distribution. We then compare the prediction accuracy of this network to the one that is using the bias.

The accuracy of the mentioned networks is evaluated across 2D cross-sections of the aberration space, as illustrated in Figure 2 and S24. Each point represents a beam with varying levels of aberration coefficients, with the color indicating the prediction error. Evaluations were conducted both within the plateau region, where aberration coefficients are in the range of 0.0 to 0.1, and across a broader range from 0 to 1. It can be observed that the network with the bias performs significantly better than the one without, exhibiting much more consistent accuracy throughout the selected aberration space.

We performed an additional evaluation to further demonstrate the accuracy of our proposed

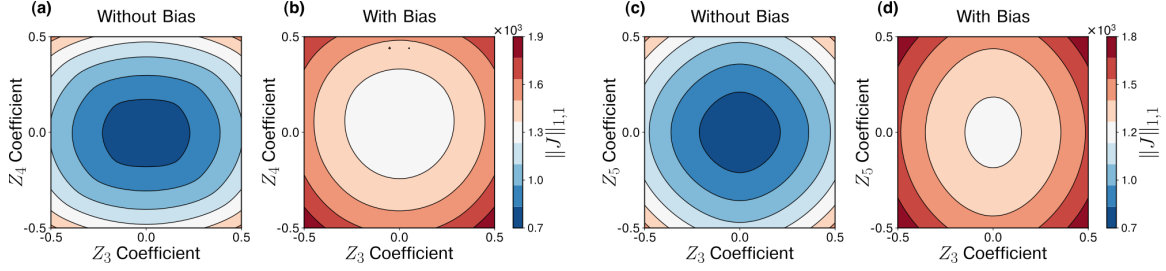

Figure S8: Jacobian norm calculated on 2D cross-sections of the aberration space (Gaussian beam), illustrating the rate of change before and after applying the bias. (a, b)  $Z_3$ - $Z_4$  space, (c, d)  $Z_3$ - $Z_5$  space. The bias increases the Jacobian norm, amplifying the effect of aberrations on intensity.

framework both within plateau regions and in other areas of the aberration space. In this experiment, the beam is aberrated by a combination of two aberration coefficients, which are varied continuously between their positive and negative values in a circular pattern. For example, if the aberration terms are  $Z_3$  and  $Z_5$ , this variation corresponds to a 180-degree rotation of the aberration pattern. We generated several aberration patterns using different aberration magnitudes: 0.1, 0.25, 0.5, and 1. The two networks from the previous section are tasked with estimating the corresponding aberration coefficients, and their predicted points are illustrated and compared to the ground truth.

Figure 2 and S25 present instances of this experiment, where the ground truth aberration is represented by a dashed circle, and the estimations from the two networks are shown as red and blue solid lines. The deviations of the red and blue curves from the dashed circle indicate the prediction errors of each network. The network without bias is not expected to predict the values in any negative region, as these were excluded from the training set to eliminate the impact of the ambiguity. However, this network also exhibits poor accuracy in the positive region, which shows the negative impact of the plateau regions. On the other hand, the network with the bias closely follows the dashed lines and successfully predicts both the magnitude and sign of the aberrations with high precision.

### 6.3 Atmospheric Turbulence

To verify the effectiveness of our framework, we evaluated it on Kolmogorov test sets designed to simulate aberrations caused by atmospheric turbulence. We generated two test sets using the first nine and fourteen polynomials. In each set, the aberration strength  $D/r_o$  varied from 0 to 5. 0 indicates no aberration (we selected a number close to 0 to maintain a consistent standard deviation), while 5 represents strong aberration.

We evaluated the framework and calculated the RMSE for each test set, achieving an average RMSE of  $0.010 \pi$  radians across all  $D/r_o$  values for  $Z_9$ , and an RMSE of  $0.014 \pi$  radians for  $Z_{14}$  (depicted in Figure 2.c-d of the main text).

We also present qualitative examples of the detection process for ( $Z_{14}, D/r_o = 4$ ) in Figure S9. Figures S26 and S27 illustrate the RMSE (in  $\pi$  radians) for the two sets,  $Z_9$  and  $Z_{14}$ , respectively. The error is plotted for each beam profile separately, which shows consistent performance across these

beams. Figure S28 shows six instances where an  $HG_{2,2}$  beam is aberrated with increasing  $D/r_o$  strength, ranging from 0 to 5, and shows how the framework effectively detects these aberrations.

## 6.4 One-hot Dataset

We evaluated our framework using the one-hot dataset, which features aberrations represented by a single Zernike mode. The RMS error obtained on this test set is  $0.013 \pi$  radians. The error distribution of this test is depicted in Figure S10.a, and the average prediction error for each polynomial is shown in Figure S10.b. We also included several quantitative examples of the detection process in Figure S11.

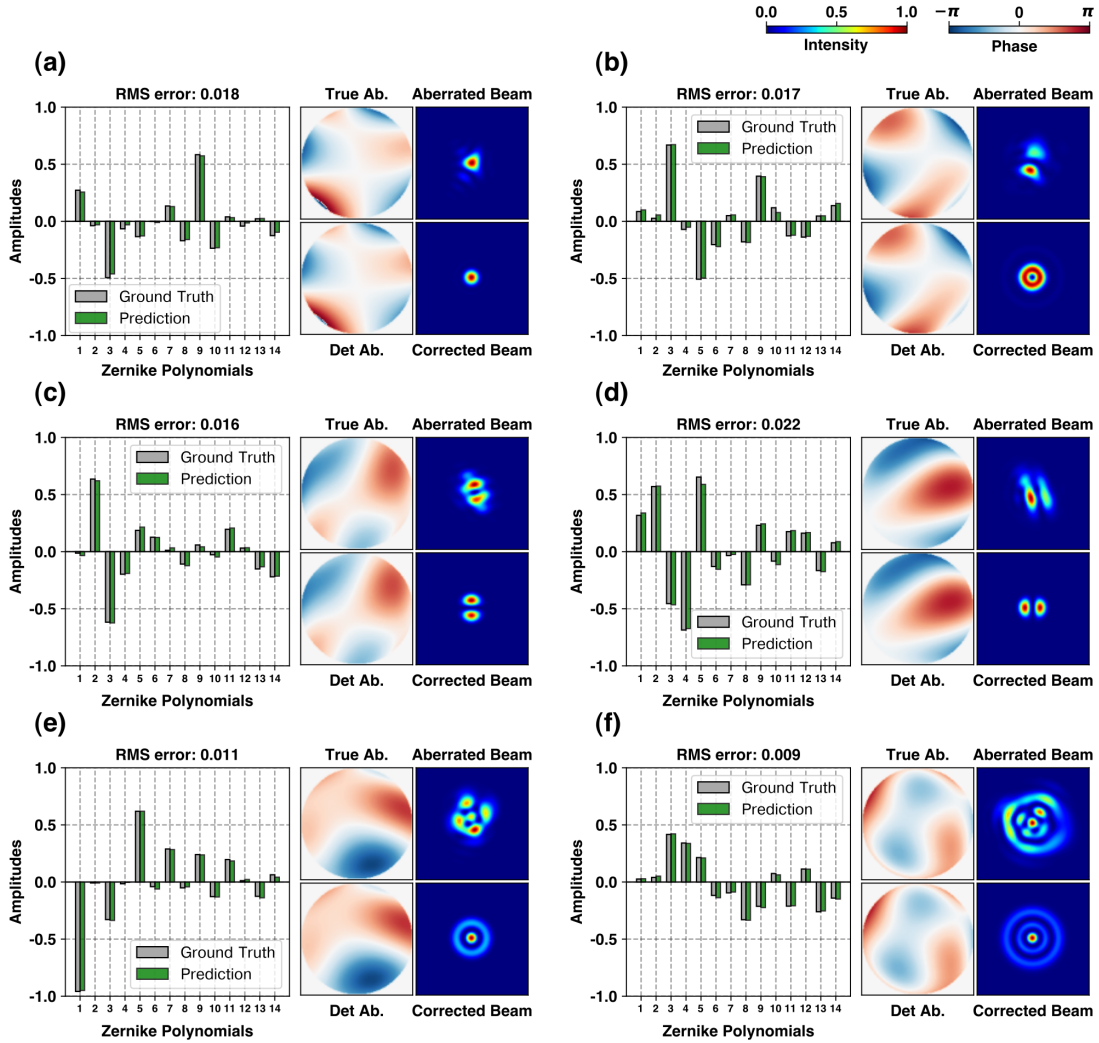

Figure S9: Qualitative examples of aberration detection using our framework on the Kolmogorov dataset ( $D/r_0 = 4$ ): (a) Gaussian, (b) OAM with  $L = 1$ , (c)  $HG_{1,0}$ , (d)  $HG_{0,1}$ , (e)  $LG_{1,0}$ , (f)  $LG_{2,0}$ . For each case, the corresponding ground truth and predicted aberration are shown in phase and Zernike space, alongside the aberrated beam and the corrected one.



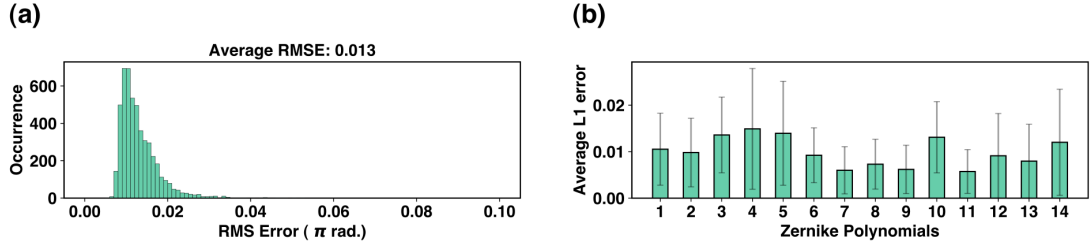

Figure S10: Evaluation results on the one-hot dataset. (a) Error distribution on the test set, (d) average L1 error for each Zernike polynomial on the test set.

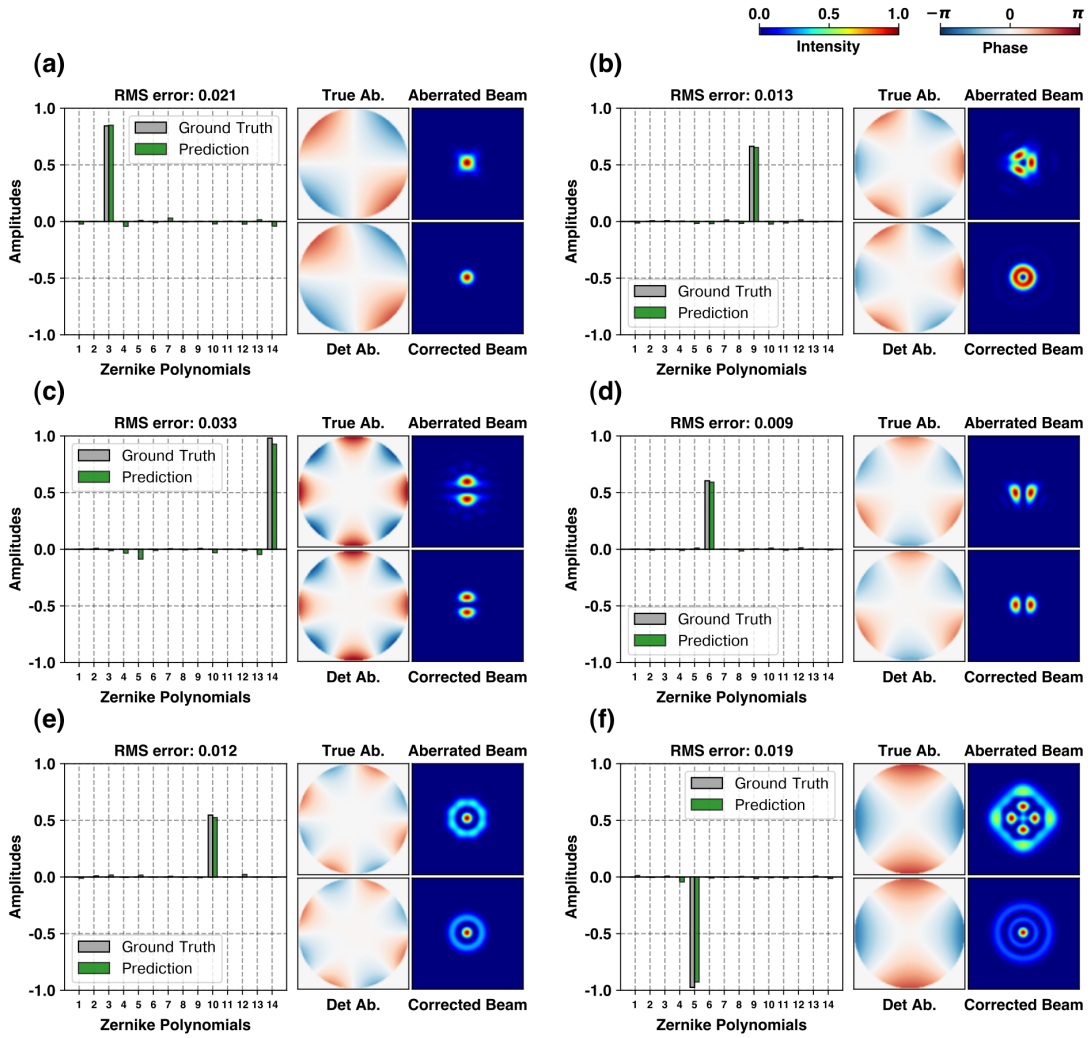

Figure S11: Qualitative examples of aberration detection using our framework on the one-hot dataset: (a) Gaussian, (b) OAM with  $L = 1$ , (c)  $HG_{1,0}$ , (d)  $HG_{0,1}$ , (e)  $LG_{1,0}$ , (f)  $LG_{2,0}$ . For each case, the corresponding ground truth and predicted aberration are shown in phase and Zernike space, alongside the aberrated beam and the corrected one.

## 7 Experiments

To experimentally confirm the efficiency of our framework, we conducted two sets of experiments: (i) using only the SLM, which generated both the aberrations and the phase shift serving as the trained bias, and (ii) using the SLM to create the aberrations combined with a fabricated metasurface providing the trained bias as a separate optical element. A liquid crystal on silicon spatial light modulator (LCOS-SLM) was used to generate aberrations for different beams. We then captured their intensity images and estimated their aberration using our framework. Since the aberrations are manually created, we are able to demonstrate beam correction by subtracting the predicted aberration coefficients from the ground-truth ones and capturing the intensity again.

### 7.1 Optical setup calibration

We calibrated our setup to minimize the discrepancies between the simulation and the experiments. First, we corrected any inherent beam aberrations. Next, we ensured that the Zernike polynomials were defined in a canonical form for both the simulation and the experiment. We also confirmed that the beam interacted fully with aberration and bias, and we adjusted the beam width to match our aperture size of 1 mm. Additionally, we separated the zeroth-order diffraction from the modulated beam by using a blazed grating. In addition, we carefully examined the intensity response of each beam to different Zernike basis functions to eliminate any further discrepancies. To maintain consistency, we evaluate our approach by looking at the extreme values of each Zernike basis function and ensuring that the total scaled aberrations match simulation predictions.

Figure S12 illustrates the simulated and experimentally generated aberrations after the calibration process, demonstrating their close alignment.

### 7.2 Noise Module

Several factors can still cause discrepancies between the intensity images generated in the simulation and those captured in experiments. Simulations are performed in ideal and noiseless settings, while

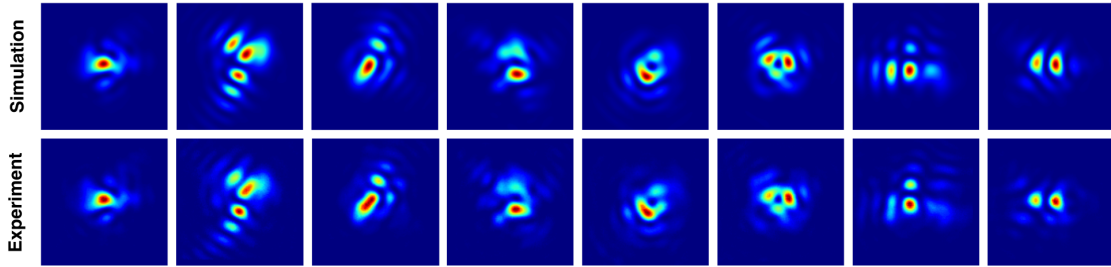

Figure S12: Comparison of simulated and experimentally generated aberrations. The top row shows simulation-generated aberrations, while the bottom row shows aberrations experimentally generated using a Spatial Light Modulator (SLM).

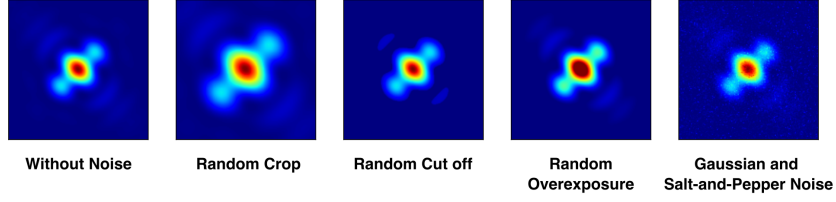

Figure S13: To ensure robustness, the framework was trained using images intentionally corrupted with common imperfections, including random cropping, random cut-off, random exposure variations, and Gaussian salt-and-pepper noise. As a result, the network accurately predicts the aberrated phase profiles from experimentally obtained images despite these imperfections.

experiments commonly encounter different types of noise. This noise can originate from the camera, SLM discretizations, fabrication imperfections in optical components, and more.

To overcome this issue, we introduce different types of noise during our simulations and retrained our framework. The updated framework can be modeled as follows:

$$\hat{\varphi} = D_{\theta}(\mathcal{G}(O_{\varphi_b}(\varphi + \varepsilon; U_0))) \quad (31)$$

Here  $\varepsilon$  represents the phase noise which follows a normal distribution  $\varepsilon \sim \mathcal{N}(0, (\frac{\pi}{8})^2)$ .  $\mathcal{G}(\cdot)$  is a function that applies various types of noise to the intensity image, including cropping, low-intensity cut-off, overexposure, Gaussian noise, and salt-and-pepper noise, each applied randomly with a predefined probability. Figure S13 demonstrates the functionality of this function.

The phase noise  $\varepsilon$  ensures that the system is robust against phase modulation imperfections, whether the modulation is performed using SLM or a fabricated device.  $\mathcal{G}$  extends this robustness to the noise during image capturing. This process can be viewed as a regularization technique, where the system learns to rely on the dominant features of the intensity image and discard the details that are altered due to the noise.

## 7.3 Results

### 7.3.1 Spatial light modulator

To quantitatively measure the performance of the framework in the first experiment, we evaluate it on the dataset with uniform coefficients and the Kolmogorov dataset ( $Z_9, D/r_o = 4$ ). We randomly sampled 250 aberrations from each dataset and generated aberrated Gaussian, OAM, and HG beams. We obtained an average RMS error of  $0.083 \pi$  radians for the uniform dataset and  $0.069 \pi$  radians for the Kolmogorov dataset. The distribution of errors is shown in Figure S14a-c. This figure also depicts the error before incorporating the noise into our system, which demonstrates the improvement in detection accuracy after using the noise module. We collected several qualitative samples of the correction process in Figure 3a for the Kolmogorov dataset and Figure S15 for the uniform dataset.

We also tested the system using different wavelengths of 500, 600, and 700 nm. We ensured that the beam interaction area remained consistent as we varied the wavelength. This experiment

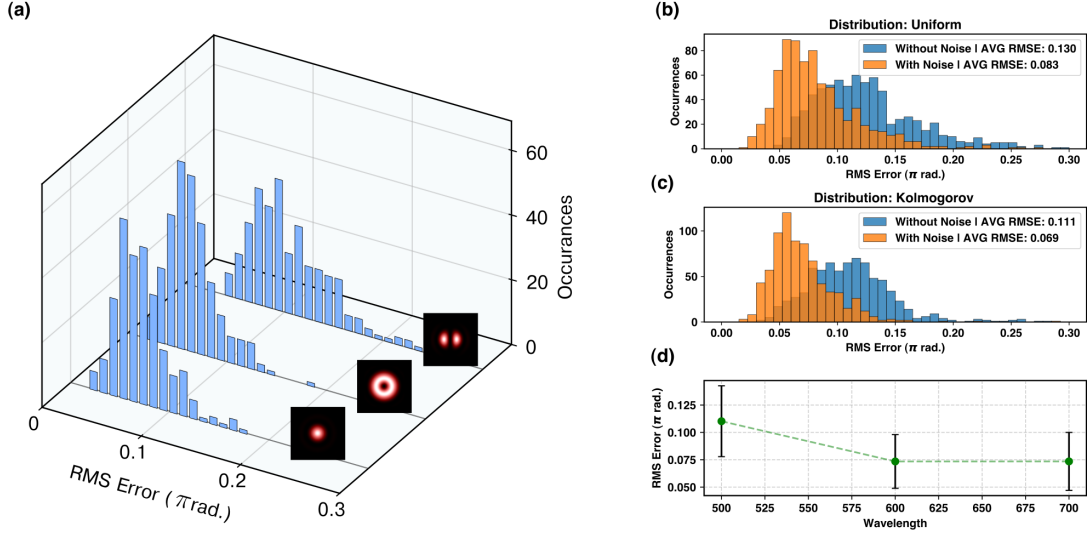

Figure S14: Quantitative results of the experiments. (a) Error distribution of the dataset with uniform coefficients calculated independently for each beams, (b) error distribution of the dataset with uniform coefficients, both before and after the incorporation of the noise module, (c) error distribution of the Kolmogorov dataset, also before and after adding the noise module, (d) performance of the framework across various wavelengths.

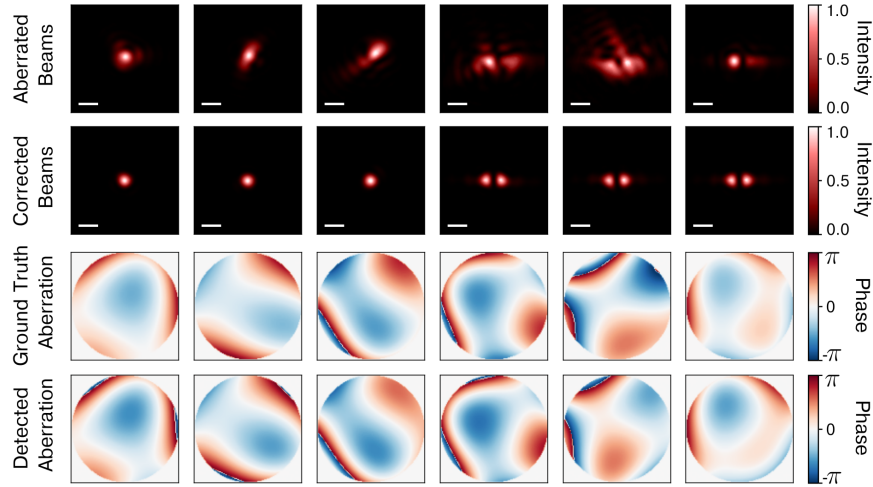

Figure S15: Qualitative examples of aberration detection and correction process experimentally performed at the wavelength of 700 nm. The first row illustrates different aberrations applied to Gaussian, and HG<sub>1,1</sub> beams, with three beams each. The second row shows the resulting beams after aberration correction using the neural network. The third row displays the ground truth aberrations used to create the aberrations. The last row presents the aberrations detected by the experimental system. Scale bars represent 200  $\mu$ m.

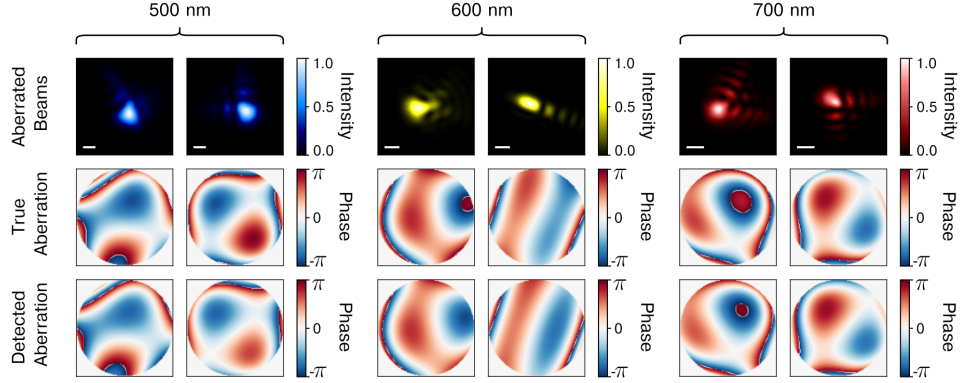

Figure S16: Verification of the broadband capability of our framework. Experiments were conducted at wavelengths of 500 nm, 600 nm, and 700 nm to test the network’s performance. Scale bars represent 200  $\mu\text{m}$ .

was performed with the Gaussian beam and the dataset with uniform coefficients. Figure S14.d illustrates the achieved RMS error. Additionally, the qualitative samples of the detection process at different wavelengths are depicted in Figure S16.

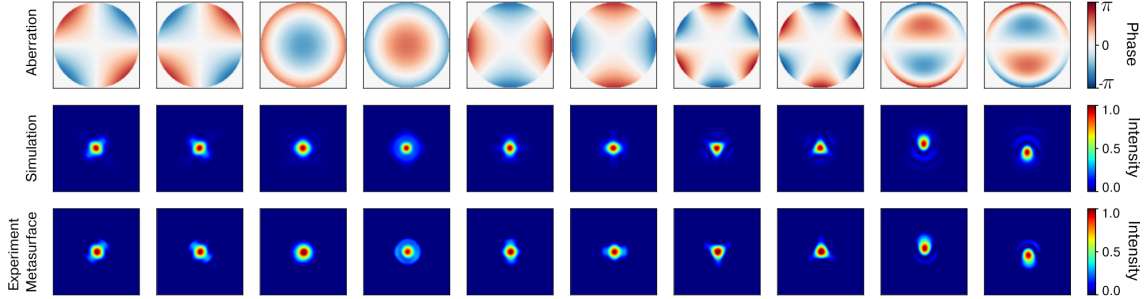

Figure S17: Intensity response of a Gaussian beam subjected to different aberrations (aberration maps shown in the first row), corresponding to Zernike modes of opposite signs. Results are shown for simulation (second row) and experiment using the fabricated metasurface (third row). The simulation accounts for the metasurface efficiency and the beam size used in the experimental setup.

The results show that the aberrations detected by our system closely match the ground truth aberrations across this 200 nm range. This confirms that our system operates effectively over a broad wavelength range, validating that our approach is not constrained by wavelength limitations.

### 7.3.2 Metasurface

To further demonstrate the effectiveness of the framework, we fabricated a  $\text{TiO}_2$  metasurface to serve as the trained bias and position it in the setup (Figure S18). The fabrication process is explained in

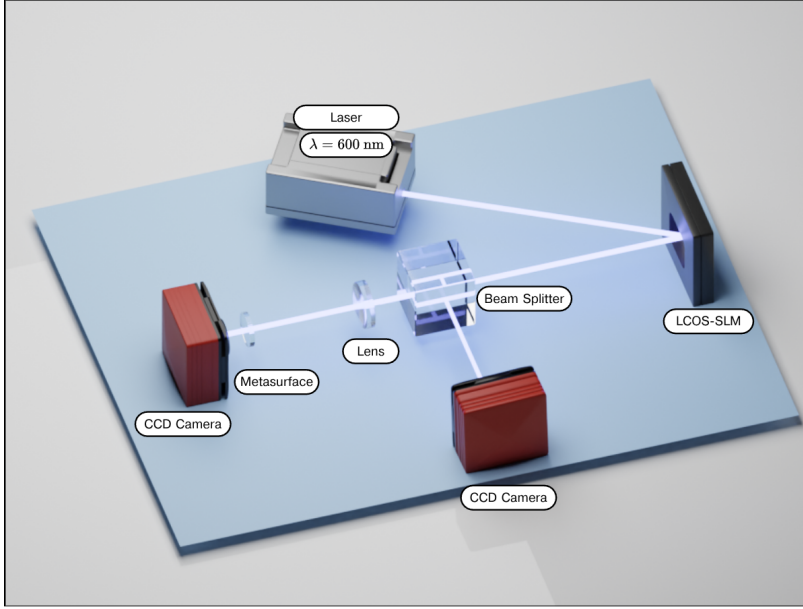

Figure S18: Experimental setup for the metasurface experiment. The beam is first aberrated using the SLM and then directed to a beamsplitter. One path passes through a focusing lens and the metasurface, which applies a phase shift to resolve phase ambiguity and enhance sensitivity to aberrations, before being captured by a CCD camera. The resulting intensity image is processed using the APN network to determine the aberrations, which are then uploaded to the SLM for beam correction. The corrected beam is directed along the other path of the beamsplitter and captured by a second camera.

the manuscript and is depicted in Figure S30. The efficiency of the fabricated metasurface is shown in Figure 5. This experiment focused on ambiguity removal in a setup with fabrication imperfections introduced by the metasurface. Using Gaussian and OAM ( $L = 1$ ) beams, the SLM applied aberrations based on the first nine individual Zernike modes with both positive and negative coefficients, while the metasurface provided phase shifts. The APN recovered aberrations and corrections were applied via the SLM (examples shown in Figure 4d). Figure S17 illustrates the intensity response of a Gaussian beam subjected to various aberrations corresponding to Zernike modes of opposite signs, along with comparisons to simulated intensity responses.

## 8 Additional Results

In this section, the additional results from Section 4 and 5 are illustrated.

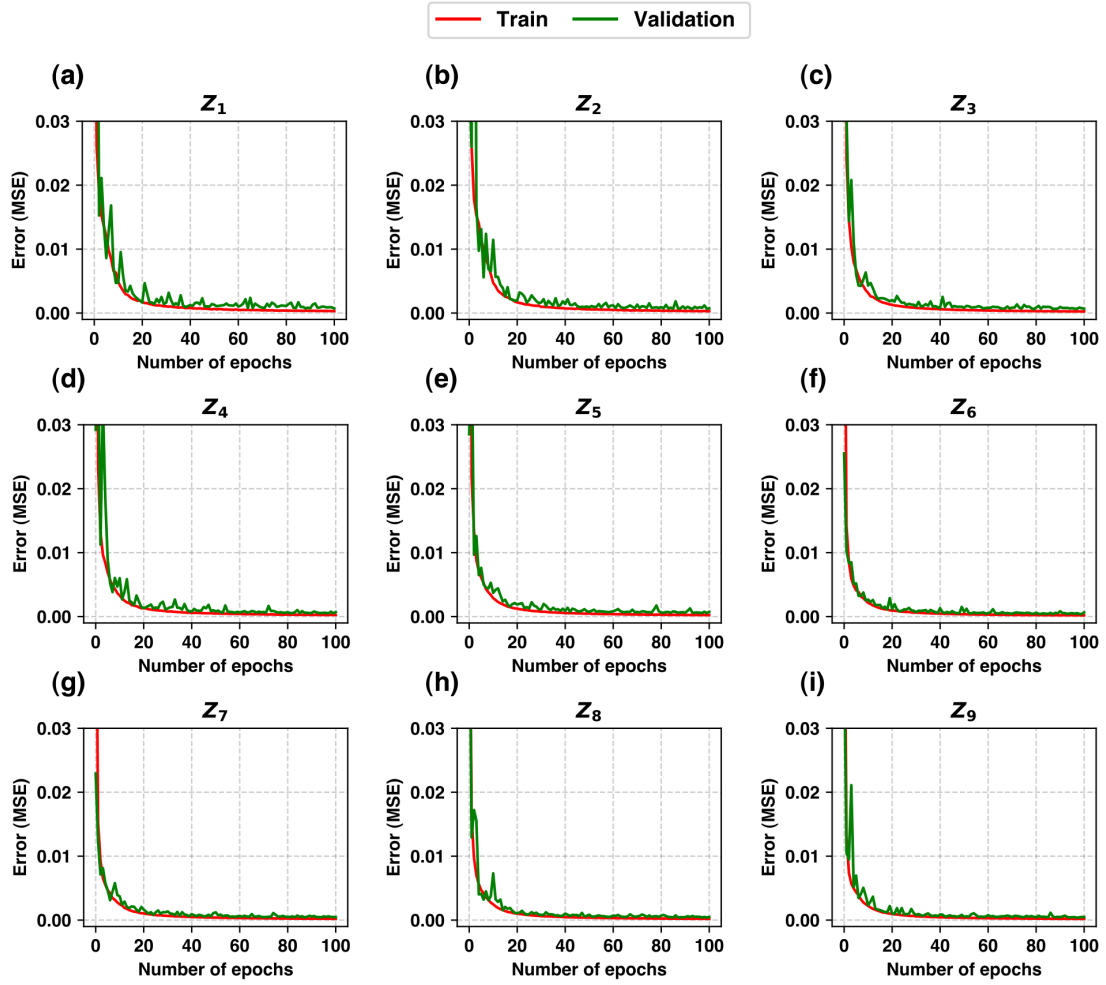

Figure S19: Learning curves segmented by individual Zernike polynomials, illustrating the training and validation errors for each term. The curves demonstrate stable convergence, indicating that neither underfitting nor overfitting is present.

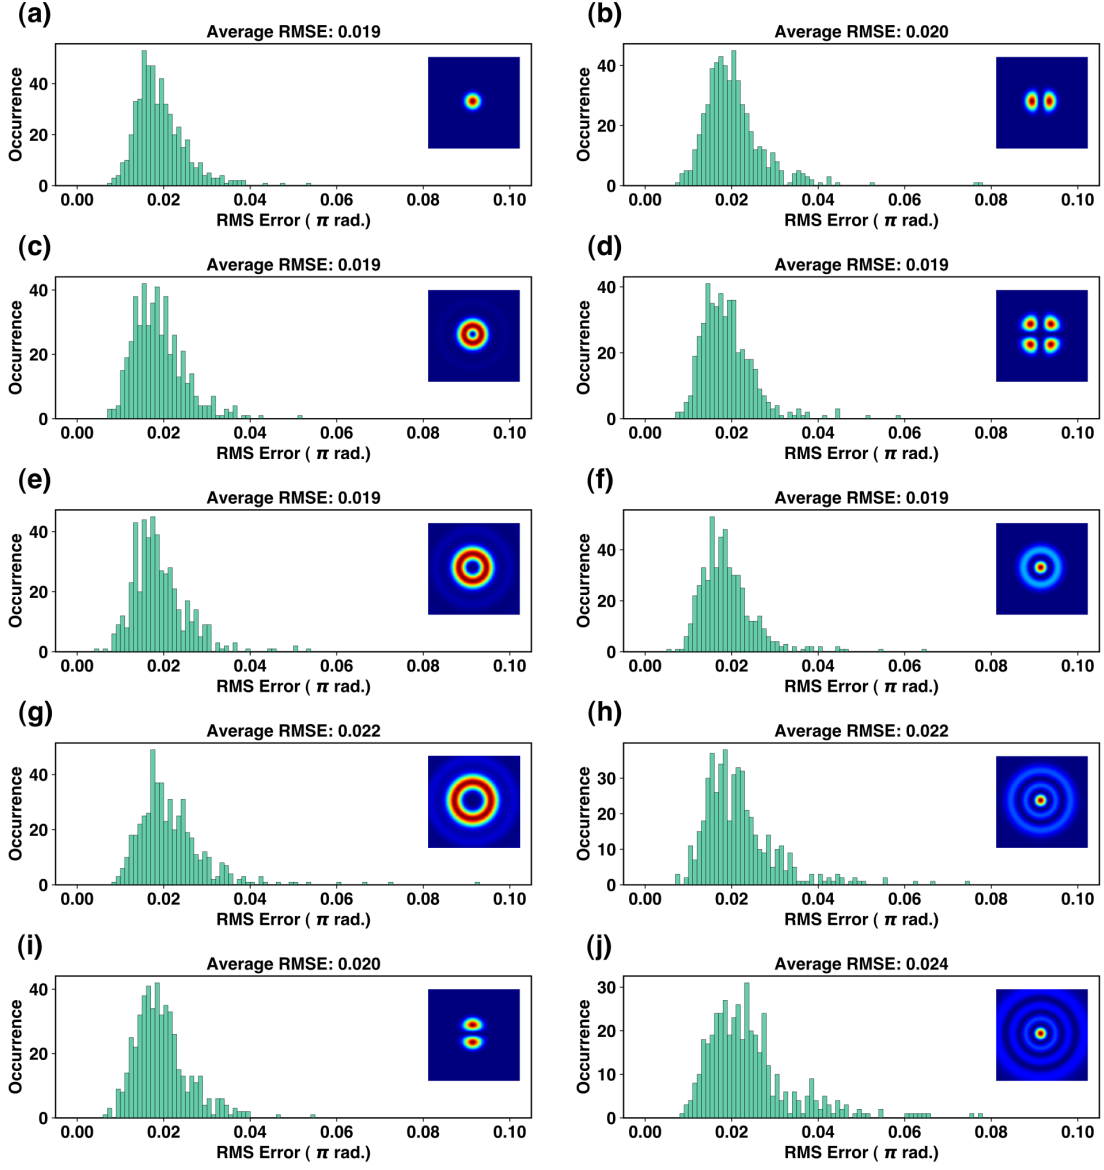

Figure S20: Error distribution per beam profile evaluated on the uniform dataset test set: (a) Gaussian, (b)  $HG_{1,0}$ , (c) OAM  $L = 1$ , (d)  $HG_{2,2}$ , (e) OAM  $L = 3$ , (f)  $LG_{1,0}$ , (g) OAM  $L = 2$ , (h)  $LG_{2,0}$ , (i)  $HG_{0,1}$ , (j)  $LG_{3,0}$ .



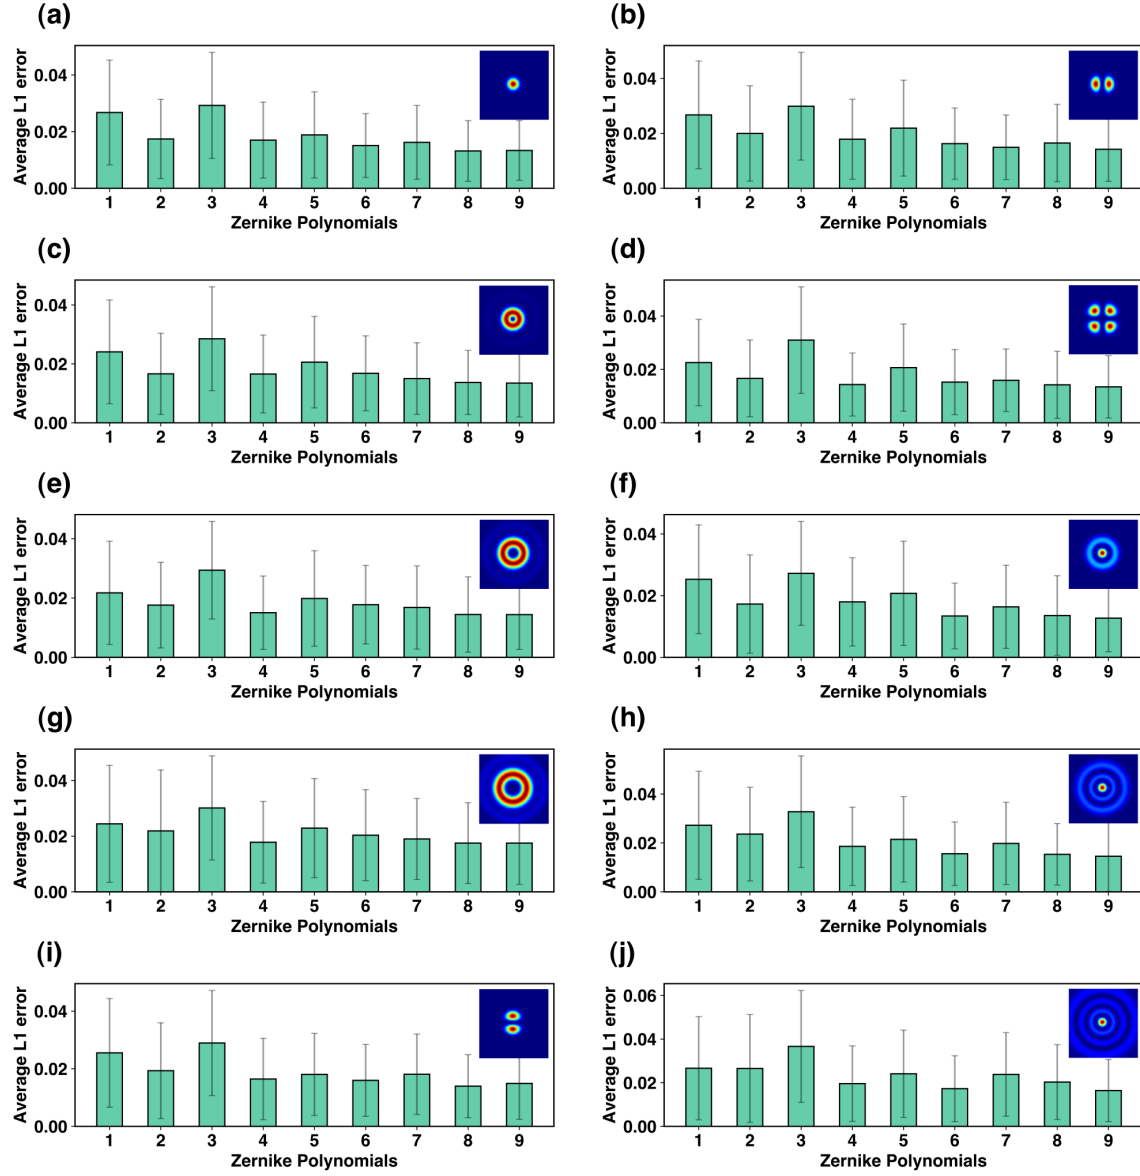

Figure S21: Prediction error for coefficients of each Zernike polynomial for each beam profile: (a) Gaussian, (b)  $HG_{1,0}$ , (c) OAM  $L = 1$ , (d)  $HG_{2,2}$ , (e) OAM  $L = 3$ , (f)  $LG_{1,0}$ , (g) OAM  $L = 2$ , (h)  $LG_{2,0}$ , (i)  $HG_{0,1}$ , (j)  $LG_{3,0}$ .

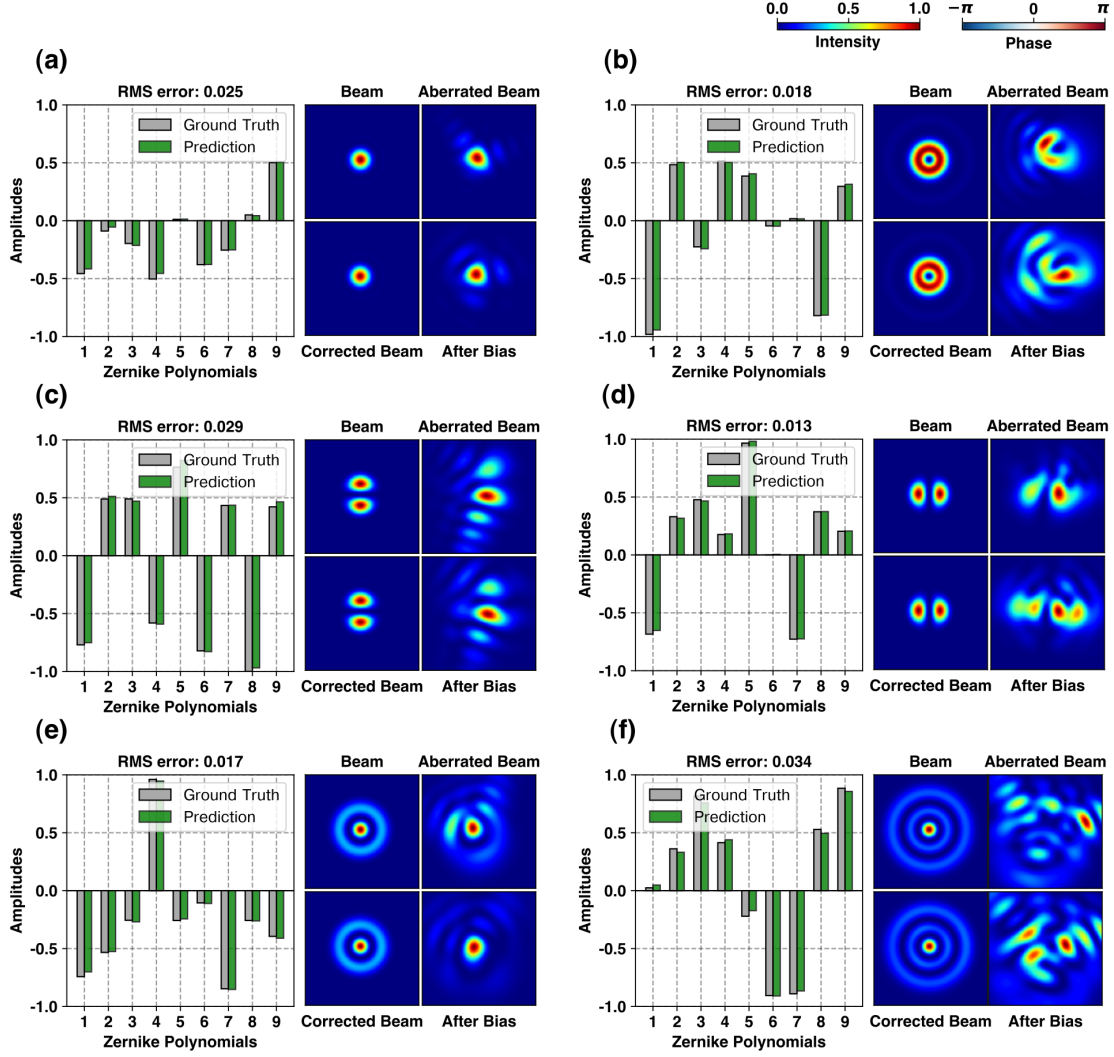

Figure S22: Qualitative examples of aberration detection using our framework on the dataset with uniform coefficients: (a) Gaussian, (b) OAM with  $L = 1$ , (c)  $HG_{1,0}$ , (d)  $HG_{0,1}$ , (e)  $LG_{1,0}$ , (f)  $LG_{2,0}$ . For each case, we show the ground-truth and predicted Zernike polynomials, the beam type, the aberrated beam, the intensity distribution after the bias, and the corresponding corrected beam.

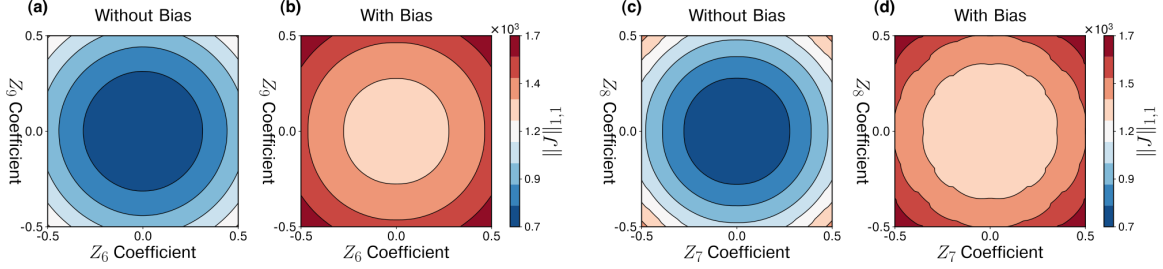

Figure S23: Jacobian norm calculated on 2D cross-sections of the aberration space (Gaussian beam), illustrating the rate of change before and after applying the bias. (a, b)  $Z_6$ – $Z_9$  space, (c, d)  $Z_7$ – $Z_8$  space. The bias increases the Jacobian norm, amplifying the effect of aberrations on intensity.

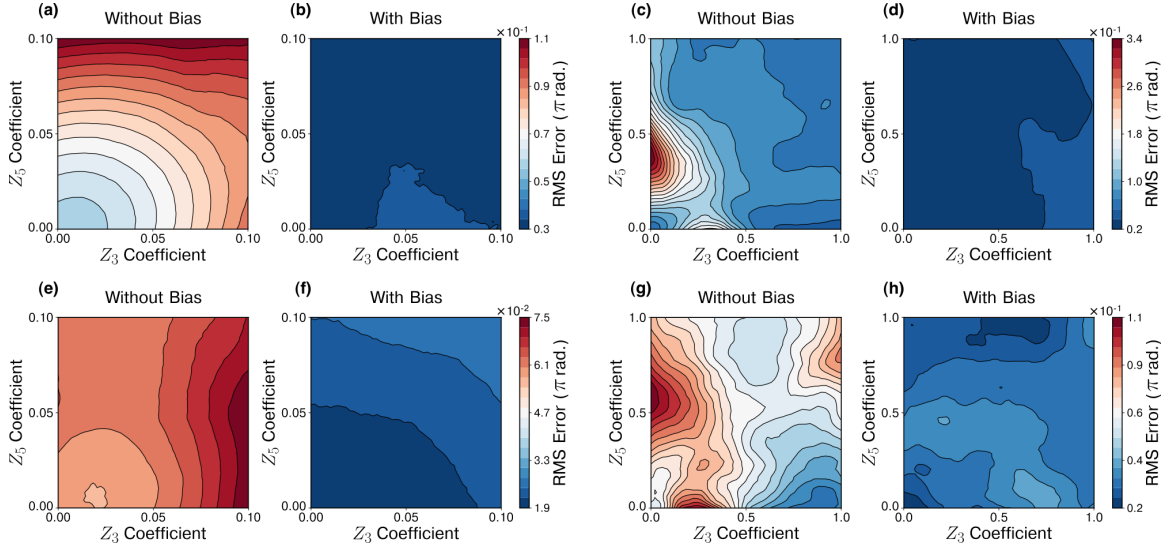

Figure S24: Prediction error of the system evaluated on the 2D cross-section of the  $Z_3$ – $Z_5$  before and after applying the bias. (a, b) Gaussian beam, range 0–0.1, (c, d) Gaussian beam, range 0–1, (e, f) OAM beam ( $L = 1$ ), ranges 0–0.1, (g, h) OAM beam ( $L = 1$ ), ranges 0–1. The bias significantly reduces prediction error and ensures consistent performance across different regions.

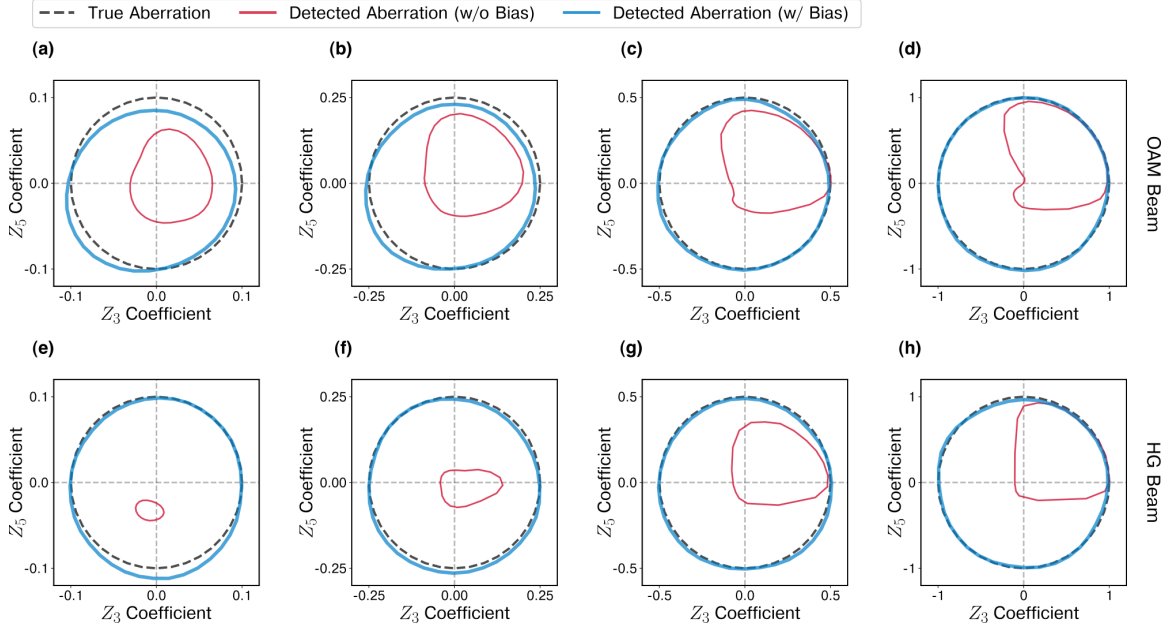

Figure S25: Network accuracy in predicting combinations of two aberration coefficients ( $Z_3$ – $Z_5$ ), varied continuously between positive and negative values in a circular pattern, with and without bias. Dashed lines indicate the ground truth aberration, solid red lines show predictions without bias, and solid blue lines show predictions with bias. (a–d) OAM beam ( $L = 1$ ) evaluated at aberration magnitudes of 0.1, 0.25, 0.5, and 1. (e–h)  $HG_{01}$  beam evaluated at the same magnitudes. The network using the bias accurately detects the aberration sign and maintains consistent, high accuracy across all magnitudes.

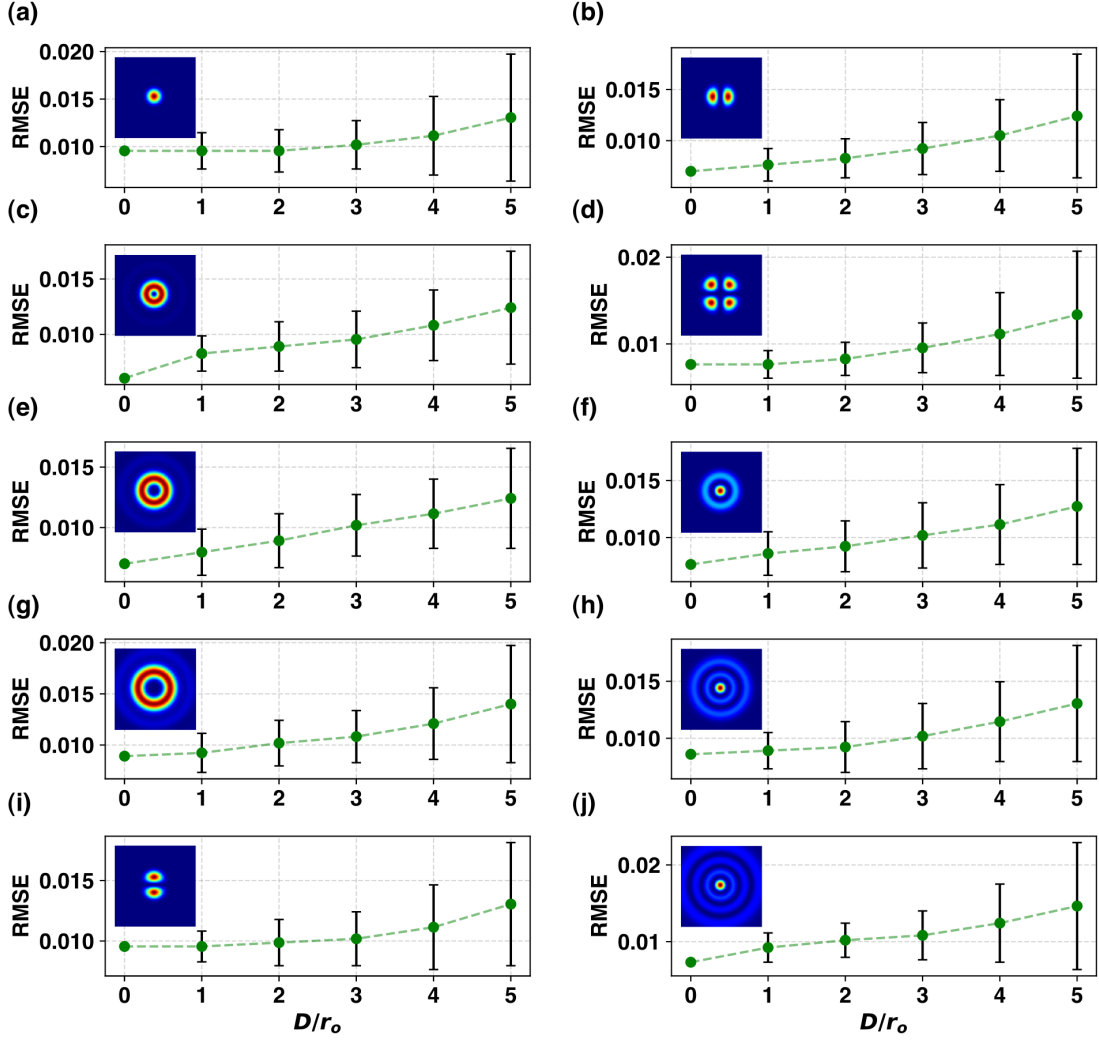

Figure S26: Effect of increasing aberration strength on RMSE across different beam types (aberration expressed in  $Z_9$ ): (a) Gaussian, (b)  $HG_{1,0}$ , (c) OAM  $L = 1$ , (d)  $HG_{2,2}$ , (e) OAM  $L = 3$ , (f)  $LG_{1,0}$ , (g) OAM  $L = 2$ , (h)  $LG_{2,0}$ , (i)  $HG_{0,1}$ , (j)  $LG_{3,0}$ .

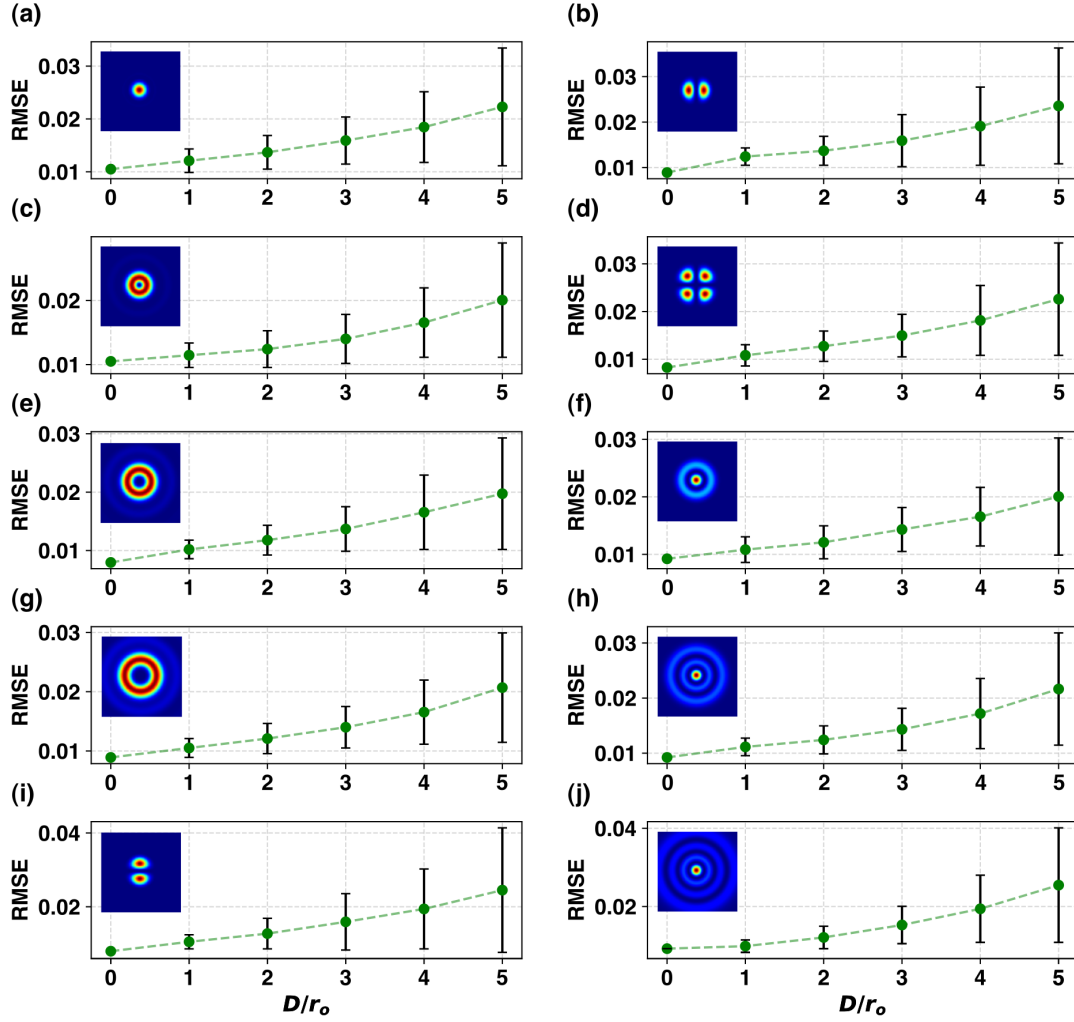

Figure S27: Effect of increasing aberration strength on RMSE across different beam types (aberration expressed in  $Z_{14}$ ): (a) Gaussian, (b) HG<sub>1,0</sub>, (c) OAM  $L = 1$ , (d) HG<sub>2,2</sub>, (e) OAM  $L = 3$ , (f) LG<sub>1,0</sub>, (g) OAM  $L = 2$ , (h) LG<sub>2,0</sub>, (i) HG<sub>0,1</sub>, (j) LG<sub>3,0</sub>.

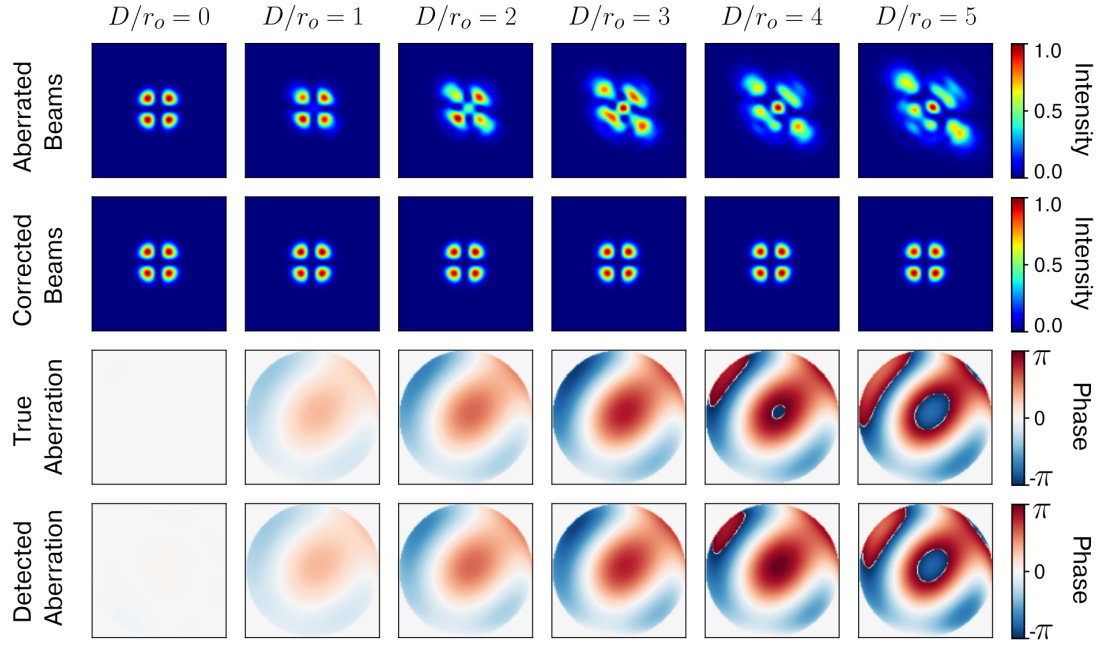

Figure S28: Effect of increasing aberration intensity on the  $HG_{2,2}$  mode. The true and detected aberration phase profiles closely match, which is further supported by the corrected beams closely resembling the ideal  $HG_{2,2}$  beam across all intensity levels.

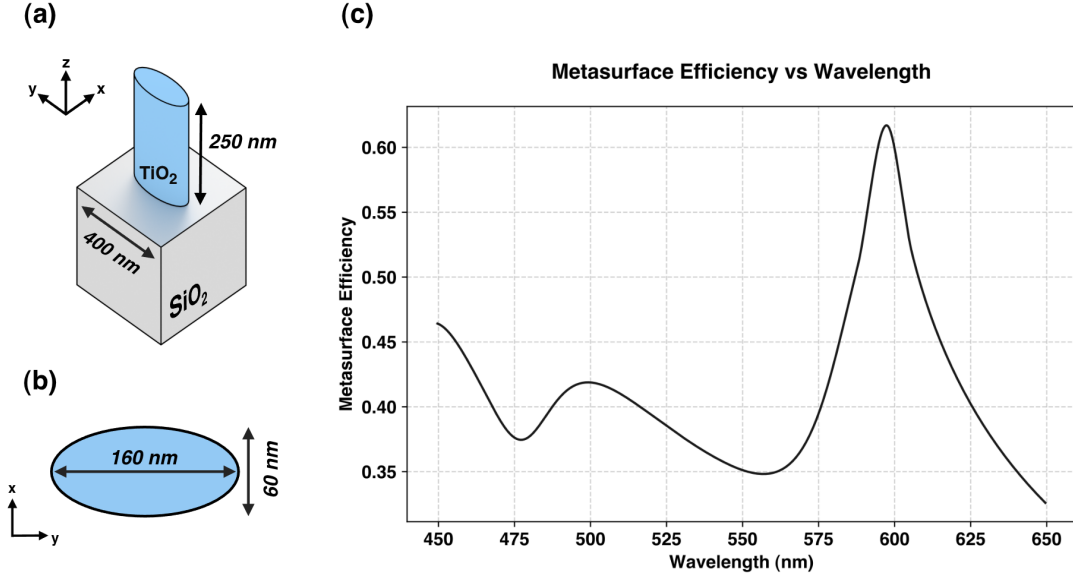

Figure S29: (a) Unit cell of the metasurface (tilted view), (b) Unit cell of the metasurface (top view), (c) efficiency vs wavelength.

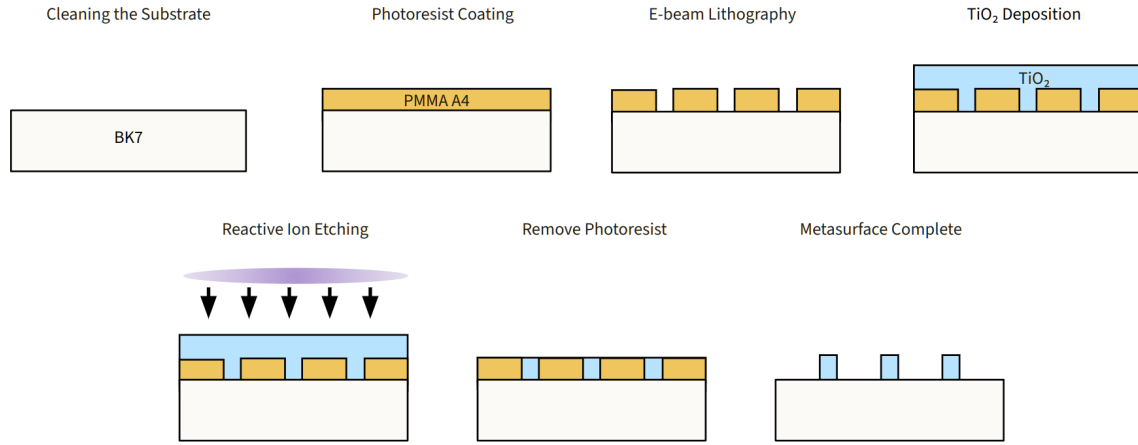

Figure S30: Metasurface fabrication process. A BK7 glass substrate was first cleaned using acetone and isopropyl alcohol (IPA) with sonication, followed by rinsing with deionized (DI) water to ensure a contaminant-free surface. A 260 nm layer of PMMA A4 electron beam resist was then spin-coated onto the substrate and baked at 180 °C for 1 minute. Electron beam lithography was performed to define the desired metasurface pattern, followed by development. A 150 nm thick  $\text{TiO}_2$  layer was subsequently deposited via atomic layer deposition (ALD) at 90 °C. The low-temperature deposition ensures the formation of amorphous  $\text{TiO}_2$  and prevents contamination of the ALD chamber. Reactive ion etching (RIE) was then used to remove excess  $\text{TiO}_2$ , employing a gas mixture of  $\text{BCl}_3$  and  $\text{Cl}_2$  with an etch rate of approximately 20 nm/min. Finally, the remaining photoresist was removed through a liftoff process, completing the fabrication of the  $\text{TiO}_2$  metasurface.



## 9 Overview of the Beams

Here we summarize the key beam solutions of the paraxial wave equation, describing the propagation of Gaussian beams in free space, including Laguerre-Gaussian beams, their specialized form as Orbital Angular Momentum (OAM) beams, and Hermite-Gaussian beams.

### 9.1 Gaussian Beam

$$E_0(x, y, z) = E_0 \frac{w_0}{w(z)} \exp\left(-\frac{x^2 + y^2}{w^2(z)}\right) \times \exp\left(-i \frac{k(x^2 + y^2)}{2R(z)}\right) \times \exp(i\psi(z)) \exp(-ikz). \quad (32)$$

- **Beam waist ( $w_0$ ):** The minimum beam radius at the focus ( $z = 0$ ). At this radius, the electric field amplitude drops to  $1/e$  of its on-axis value.
- **Rayleigh range ( $z_R$ ):** The distance over which the beam significantly diverges, defined as:

$$z_R = \frac{\pi w_0^2}{\lambda}.$$

At  $z = z_R$ , the beam radius expands to  $\sqrt{2}w_0$ .

- **Beam radius ( $w(z)$ ):** Describes the beam expansion at distance  $z$ :

$$w(z) = w_0 \sqrt{1 + \left(\frac{z}{z_R}\right)^2}.$$

- **Radius of curvature ( $R(z)$ ):** The wavefront curvature radius at position  $z$ :

$$R(z) = z \left[ 1 + \left(\frac{z_R}{z}\right)^2 \right].$$

- **Gouy phase ( $\psi(z)$ ):** Longitudinal phase shift acquired through propagation:

$$\psi(z) = \arctan\left(\frac{z}{z_R}\right).$$

These parameters collectively describe beam propagation, divergence, and phase accumulation.

### 9.2 Laguerre-Gaussian (LG) Modes and OAM

Laguerre-Gaussian modes form a set of cylindrically symmetric solutions characterized by radial index  $p$  and azimuthal index  $\ell$ . The electric field amplitude in cylindrical coordinates  $(r, \theta, z)$  is expressed as:

$$\begin{aligned}
E_{p,\ell}(r, \theta, z) = & E_0 \frac{w_0}{w(z)} \left( \frac{r\sqrt{2}}{w(z)} \right)^{|\ell|} L_p^{|\ell|} \left( \frac{2r^2}{w^2(z)} \right) \\
& \times \exp \left( -\frac{r^2}{w^2(z)} \right) \exp \left( -i \frac{kr^2}{2R(z)} \right) \\
& \times \exp(i\ell\theta) \exp(i\psi(z)) \exp(-ikz),
\end{aligned} \tag{33}$$

where  $L_p^{|\ell|}$  are generalized Laguerre polynomials.

### 9.2.1 Orbital Angular Momentum (OAM) Beams

LG modes with  $p = 0$  (LG<sub>0,ℓ</sub>) carry orbital angular momentum (OAM). They exhibit a doughnut-shaped intensity profile and a helical wavefront:

$$\begin{aligned}
E_{0,\ell}(r, \theta, z) = & E_0 \frac{w_0}{w(z)} \left( \frac{r\sqrt{2}}{w(z)} \right)^{|\ell|} \\
& \times \exp \left( -\frac{r^2}{w^2(z)} \right) \exp \left( -i \frac{kr^2}{2R(z)} \right) \\
& \times \exp(i\ell\theta) \exp(i\psi(z)) \exp(-ikz).
\end{aligned} \tag{34}$$

Each photon in this beam carries OAM equal to  $\ell\hbar$ .

## 9.3 Hermite-Gaussian (HG) Modes

Hermite-Gaussian modes are rectangularly symmetric beam solutions characterized by indices  $l$  and  $m$  denoting the node number along the  $x$  and  $y$  axes. The electric field amplitude in Cartesian coordinates  $(x, y, z)$  is:

$$\begin{aligned}
E_{l,m}(x, y, z) = & E_0 \frac{w_0}{w(z)} H_l \left( \frac{\sqrt{2}x}{w(z)} \right) H_m \left( \frac{\sqrt{2}y}{w(z)} \right) \\
& \times \exp \left( -\frac{x^2 + y^2}{w^2(z)} \right) \exp \left( -i \frac{k(x^2 + y^2)}{2R(z)} \right) \\
& \times \exp(i\psi_{l,m}(z)) \exp(-ikz),
\end{aligned} \tag{35}$$

with  $H_l$  and  $H_m$  being Hermite polynomials. Higher-order HG modes have more complex intensity patterns and accumulate Gouy phase faster than the fundamental mode, following:

$$\psi_{l,m}(z) = (l + m + 1) \arctan \left( \frac{z}{z_R} \right).$$

HG modes form a complete basis set for describing rectangular-symmetric paraxial beams. They naturally represent the transverse eigenmodes of laser resonators with rectangular geometry.

## References

1. Hinton GE and Zemel R. Autoencoders, Minimum Description Length and Helmholtz Free Energy. In: *Advances in Neural Information Processing Systems*. Ed. by Cowan J, Tesauro G, and Alspector J. Vol. 6. Morgan-Kaufmann, 1993.
2. Hu Y, Wang Z, Wang X, et al. Efficient full-path optical calculation of scalar and vector diffraction using the Bluestein method. *Light: Science & Applications* 2020;9:119.
3. He K, Zhang X, Ren S, and Sun J. Deep Residual Learning for Image Recognition. In: *2016 IEEE Conference on Computer Vision and Pattern Recognition (CVPR)*. 2016:770–8. DOI: 10.1109/CVPR.2016.90.
4. Akiba T, Sano S, Yanase T, Ohta T, and Koyama M. Optuna: A Next-generation Hyperparameter Optimization Framework. In: *Proceedings of the 25th ACM SIGKDD International Conference on Knowledge Discovery and Data Mining*. 2019.
5. McGlamery BL. Computer Simulation Studies Of Compensation Of Turbulence Degraded Images. In: *Image Processing*. Ed. by Urbach JC. Vol. 0074. International Society for Optics and Photonics. SPIE, 1976:225–33. DOI: 10.1117/12.954724. URL: <https://doi.org/10.1117/12.954724>.
6. Roddier N. Atmospheric wavefront simulation using Zernike polynomials. *Optical Engineering* 1990;29:1174–80.
7. Zhang R, Isola P, Efros AA, Shechtman E, and Wang O. The Unreasonable Effectiveness of Deep Features as a Perceptual Metric. In: *CVPR*. 2018.
